Redding *et al.* Impact of global change on future Ebola emergence and spread.

1 **Title: Impact of global change on future Ebola emergence and epidemic**  
2 **potential in Africa**

3 **Authors:** D. W. Redding<sup>1\*</sup>, P. M. Atkinson<sup>2</sup>, A. A. Cunningham<sup>3</sup>, G. Lo Iacono<sup>4,5</sup>, L. M.  
4 Moses<sup>6</sup>, J. Wood<sup>4</sup>, and K. E. Jones<sup>1,3\*</sup>

5 **Affiliations:**

6 <sup>1</sup> Centre for Biodiversity and Environment Research, Department of Genetics, Evolution and  
7 Environment, University College London, Gower Street, London, WC1E 6BT, United  
8 Kingdom.

9 <sup>2</sup>Geography and Environment, University of Southampton, Southampton SO17 1BJ, United  
10 Kingdom.

11 <sup>3</sup>Institute of Zoology, Zoological Society of London, Regent's Park, London, NW1 4RY,  
12 United Kingdom.

13 <sup>4</sup>Department of Veterinary Medicine, Disease Dynamics Unit, University of Cambridge,  
14 Cambridge, United Kingdom.

15 <sup>5</sup>Environmental Change Department, Public Health England, Didcot, United Kingdom.

16 <sup>6</sup>Department of Global Community Health and Behavioral Sciences, Tulane University, New  
17 Orleans, Louisiana, United States of America.

18 **\*Correspondence to:** D. Redding ([d.redding@ucl.ac.uk](mailto:d.redding@ucl.ac.uk)); K. E. Jones  
19 ([kate.e.jones@ucl.ac.uk](mailto:kate.e.jones@ucl.ac.uk)).

20 **Keywords:** bats, climate, ebola virus disease, environmental-mechanistic disease model,  
21 global change, land-use.

Redding *et al.* Impact of global change on future Ebola emergence and spread.

22 **Abstract:** Animal-borne or zoonotic human diseases (e.g., SARS, Rabies) represent major  
23 health and economic burdens throughout the world, disproportionately impacting poor  
24 communities. In 2013-2016, an outbreak of the Ebola virus disease (EVD), a zoonotic disease  
25 spread from animal reservoirs caused by the Zaire Ebola virus (EBOV), infected  
26 approximately 30,000 people, causing considerable negative social and economic impacts in  
27 an unexpected geographical location (Sierra Leone, Guinea, and Liberia). It is not known  
28 whether the spatial distribution of this outbreak and unprecedented severity was precipitated  
29 by environmental changes and, if so, which areas might be at risk in the future. To better  
30 address the major health and economic impacts of zoonotic diseases we develop a system-  
31 dynamics approach to capture the impact of future climate, land use and human population  
32 change on Ebola (EVD). We create future risk maps for affected areas and predict between a  
33 1.75 and 3.2-fold increase in EVD outbreaks per year by 2070. While the best case future  
34 scenarios we test saw a reduction in the likelihood of epidemics, other future scenarios with  
35 high human population growth and low rates of socioeconomic development saw a fourfold  
36 increase in the risk of epidemics occurring and almost 50% increase in the risk of  
37 catastrophic epidemics. As well as helping to target where health infrastructure might be  
38 further developed or vaccines best deployed, our modelling framework can be used to target  
39 global interventions and forecast risk for many other zoonotic diseases.

40 **Significance Statement:** Despite the severe health and economic impacts of outbreaks of  
41 diseases like SARS or Zika, there has been surprisingly little progress in predicting where  
42 and when human infectious disease outbreaks will occur next. By modelling the impacts of  
43 future climate, land use and human population change on one particular disease Ebola, we  
44 develop future risk maps for the affected areas and predict 1.7-3.2 times as many human  
45 Ebola outbreaks per year by 2070, and a 50% increase in the chance that these outbreaks will  
46 become epidemics. As well as helping to target where health infrastructure might be further

Redding *et al.* Impact of global change on future Ebola emergence and spread.

47 developed or vaccines deployed, our approach can also be used to target actions and predict  
48 risk hotspots for many other infectious diseases.

49 **Introduction:** Little is known about how the majority of human infectious diseases will be  
50 affected by predicted future global environmental changes (such as climate, land use, human  
51 societal and demographic change) (1-5). Importantly, two thirds of human infectious diseases  
52 are animal-borne (zoonotic) (6) and these diseases form a major, global health and economic  
53 burden, disproportionately impacting poor communities (7, 8). Many zoonotic diseases are  
54 poorly understood, and global health responses to them are chronically underfunded (9). The  
55 2013-2016 Ebola outbreak was unprecedented in terms of size, financial cost, and  
56 geographical location (10, 11); a stark illustration of our knowledge gaps, and demonstrating  
57 that it is imperative we develop quantitative approaches to better forecast zoonotic disease  
58 risk.

59 Ebola virus disease (EVD) was first identified in 1976, and since then there have been  
60 approximately 23 recognized outbreaks (12), predominantly within central Africa. EVD is  
61 caused by any one of four pathogenic strains of Ebola virus: Zaire (EBOV), Sudan (SUDV),  
62 Tai Forest (TAFV), and Bundibugyo (BDBV). It presents as a non-specific febrile illness that  
63 can cause haemorrhagic fever, often with a high case fatality rate in diagnosed patients (13).  
64 Some Old World fruit bat species (Family Pteropodidae) have been suggested as reservoir  
65 hosts (14), however, while there is limited direct evidence, they are strong candidates to play  
66 a key role either as an reservoir or amplifying host (15, 16). In areas with EVD, there are  
67 frequent direct and indirect human-bat interactions, e.g., via bush meat hunting and during  
68 fruit harvesting (17), presenting numerous opportunities for bat-to-human pathogen spill-  
69 overs to occur. Additionally, a third of known zoonotic spill-overs have been connected to  
70 contact with great apes and duikers, although there is no evidence that these species act as  
71 reservoir hosts (10). It is clear, however, that once spill-over occurs human social factors

Redding *et al.* Impact of global change on future Ebola emergence and spread.

72 such as movement and healthcare responses greatly influence the cumulative outcome of an  
73 outbreak (18). For instance, previous work has highlighted the importance of family  
74 interactions (19), funeral practices (20) and differential transmission rates in hospitalized  
75 individuals (18).

76 Many attempts to understand Ebola outbreak dynamics have focused on mechanistic  
77 modelling approaches of human-to-human transmission post spill-over from animal hosts  
78 (13, 18, 19, 21-24). Mechanistic, or process-based, models are ideal for capturing  
79 epidemiological characteristics of diseases and, importantly, testing how disease outbreaks  
80 might be impacted by intervention efforts (25). One downside is that mechanistic models  
81 rarely incorporate spatially heterogeneous ecological and environmental information (26),  
82 such as the known high variance of bat abundance and pathogen sero-prevalence across  
83 widespread individuals (27). In this context, correlative, or pattern-based, models (e.g.  
84 MaxEnt, Boosted-regression trees) have been used to simultaneously capture the spatial risk  
85 of both zoonotic spill-over and subsequent human-to-human infection (12). For some  
86 spatially-explicit analyses, there have been attempts to incorporate spatial patterns of human  
87 populations (28), while other have included air transportation networks (29), but no studies  
88 that we are aware of have considered whole-system analyses for major epidemic zoonoses,  
89 such as Ebola. Like other rare or poorly-sampled diseases, Ebola suffers from limited data  
90 availability, meaning pattern-finding, correlative analytical techniques are at a disadvantage  
91 (30).

92 In 2014 a spill-over in Gueckedou district, Guinea of Ebola-Zaire virus led to an EVD  
93 outbreak approximately 100 times larger than any of the previous 21 known outbreaks (31).  
94 Such epidemics have a disproportionate impact on the affected societies. For example, the  
95 World Bank estimates a cost of US\$2.2 billion to the three most affected countries (32) due  
96 to, amongst other drivers, widespread infrastructure breakdown, mass migration, crop

Redding *et al.* Impact of global change on future Ebola emergence and spread.

97 abandonment and a rise in endemic diseases due to overrun healthcare systems. Recent work  
98 has uncovered the human-to-human transmission patterns underlying this outbreak, using  
99 case (33) and genomic data (31) to demonstrate that EVD spread can be successfully  
100 predicted by a dispersal model that is weighted by both geographic distance and human  
101 population density. Attempting to understand zoonotic epidemic risk, however, using a  
102 human-only transmission model and without incorporating host ecology would inevitably  
103 lead to areas with high human density and connectivity being identified as the regions with  
104 the highest risk, despite some areas of these lacking competent hosts. Therefore, to model  
105 both the spatial variation in spill-over risk and, concurrently, the likely progression of  
106 subsequent outbreaks in human populations, we need to take a system-dynamics modelling  
107 approach (1, 34). Key non-linear feedbacks can also be captured, for example, the trade-off  
108 between increasing human populations and loss of reservoir host species through  
109 anthropogenic land-use conversion, and using this to design the optimal roll-out of  
110 vaccinations (35) and other interventions in a changing landscape.

111 Here, we use a disease system-dynamics approach (Fig. 1) to extend a discrete-time,  
112 stochastic epidemiological compartmental model incorporating spatial environmental  
113 variability (Environmental-Mechanistic Model or EMM, Fig. 2) to simulate present day spill-  
114 over and subsequent human-to-human transmission of the Zaire Ebola virus (EBOV) (the  
115 strain responsible for the 2013-2016 outbreak in West Africa). We model the impact of future  
116 anthropogenic changes on the occurrence and spread of this disease in 2070 (36-38) under a  
117 variety of possible integrated global change scenarios (39). We use a combination of three  
118 Representative Concentration Pathways (RCP) scenarios of increasing greenhouse gas  
119 concentrations: RCP4.5, RCP6, and RCP8.5 (40), and three possible socio-economic  
120 development scenarios (Shared Socio-economic Pathways or SSP), ordered by increasing  
121 human population density and reduced regional socio-economic cooperation: SSP1, SSP2

Redding *et al.* Impact of global change on future Ebola emergence and spread.

122 and SSP3. Finally, we compare the changes to spatial patterns of risk and chances of  
123 outbreaks and epidemics occurring across Africa.

124 **Results:** Our EMM simulation for present day EBOV-EVD risk correctly identified areas of  
125 observed outbreaks as high risk, such as Democratic Republic of Congo, Gabon and the  
126 2013-2016 outbreak in West Africa, but also identified some areas where EVD has not been  
127 reported, such as Nigeria and Ghana (Fig. 3A). As a result, our model suggests that the at-risk  
128 area for EBOV-EVD is much larger than the areas known to have experienced disease  
129 outbreaks thus far. Our risk map also identified areas that are endemic for the other EVD  
130 strains, likely due to similar transmission pathways and reservoir host characteristics (Fig.  
131 3A). Although the index case risk map (Fig. 3B) shows a similar spatial pattern to all cases,  
132 high risk spill-over areas are constrained to more distinct hot-spots. Importantly, the locations  
133 of index cases that resulted in epidemics were even more geographically constrained, with  
134 Ghana, Sierra Leone, Liberia, Kenya Uganda and Cameroon all having medium risk but  
135 Nigeria is the focus of the highest potential for epidemic spill-over (Fig. 3C). Comparing the  
136 mean number of spill-overs per year gave higher results for present day simulations with  
137 2.464 spill-overs per year (95% CI 2.361-2.567) compared to the mean historical number  
138 over the last 40 years: 0.75 (95% CI 0.695-0.905). High risk of Ebola case importation using  
139 the current network of airline flights was seen in China, Russia, India, the United States as  
140 well as many high-income European countries (Fig. 4). Especially high importation risk,  
141 however, was seen in Italy and Germany.

142 Similar to historic data (Fig. S3), the distribution of the final size of the simulated outbreaks  
143 was multimodal with distinct peaks at very low numbers (less than 3 cases) and medium  
144 outbreaks (approximately 3-1500 cases) (Fig. S3). Through extensive simulations we were  
145 able to explore the lower probability areas of the distribution effectively and, unique to the  
146 simulation data, there is a third peak of outbreaks (here we term 'epidemics') with high, to

Redding *et al.* Impact of global change on future Ebola emergence and spread.

147 very high, numbers of cases (1500-100,000,000 cases). This threshold of assigning an  
148 outbreak with greater than 1500 cases as an epidemic also corresponds to the top 1 percentile  
149 of a log-normal distribution approximating the variation in pre-2016 observed outbreak sizes  
150 (~1538 cases per year). Of the ~2500 simulation runs for present day conditions, epidemics  
151 (>1500) occurred approximately in 5.8% of the yearly simulations, with catastrophic  
152 epidemics (>2,000,000) occurring in around 2.3% of simulations, or once every 43.5 years  
153 given current conditions. From the sensitivity testing, the key parameters that affected  
154 outbreak size were illness length and  $R_0$ , which positively increased case numbers (Fig. S4a),  
155 whereas the annual spill-over rate (Fig. S4b) was most impacted by the spill-over rate  
156 constant (strongly positive), shape of the poverty/spill-over curve (weakly positive), and by  
157 host movement distance (weakly negative).

158 Our future EMM simulations estimate an annual increase in maximum area impacted by the  
159 disease from 3.45 million km<sup>2</sup> to 3.8 million km<sup>2</sup> under the scenario by 2070, with increases  
160 in maximum area seen under all future scenarios (Fig. 5A,D,G). The maximum areas where  
161 spill-overs could occur, however, increased by just 1% under the RCP4.5 SSP1 (Fig. 5B: 2.01  
162 million km<sup>2</sup>), when compared to present day (Fig. 3B: 1.99 million km<sup>2</sup>), but increased by  
163 14.7% under the RCP8.5 SSP3 (Fig. 5H: 2.29 million km<sup>2</sup>) scenario. Conversely, the total  
164 area where epidemics could start decreased under the RCP4.5 SSP1 by 47% (Fig. 5C: 0.444  
165 million km<sup>2</sup>), when compared to present day (Fig. 3C: 0.836 million km<sup>2</sup>), but again increases  
166 under RCP6 SSP2 this time by 20.5%, and by 34% under the RCP8.5 SSP3 scenario (Fig.  
167 5F,I).

168 The increases seen in the area affected is mirrored by greater total numbers of spill-overs  
169 experienced in future scenarios, with the greatest increase seen under the RCP8.5 SSP3  
170 scenario at 7.92 (CI 7.62-8.19) spill-overs per year. Spill-over numbers increased with  
171 greenhouse gas concentrations (represented here by the RCP value) with a mean 0.257 spill

Redding *et al.* Impact of global change on future Ebola emergence and spread.

172 over a year increase between the RCP4.5 SSP2 and RCP6 SSP2 scenarios, and a mean 0.343  
173 spill over a year increase between the RCP6 SSP3 and RCP8.5 SSP3 scenarios. Greater  
174 increases were seen, however, with SSP change, with a mean 1.297 spill over a year increase  
175 between RCP4.5 SSP1 and RCP4.5 SSP2 and a mean 1.475 spill over a year increase  
176 between RCP6 SSP2 and RCP6-SSP3. In general, the probability of the index cases resulting  
177 in small outbreaks reduced in future environments, whereas the chance of epidemics  
178 increased (Fig. 6). For instance, the proportion of epidemics per year (>1500 cases) decreased  
179 in the RCP4.5 SSP1 to 3.43% (from 5.8% in present day) but increased in all others, with  
180 RCP6 SSP3 gaining the greatest number, with epidemics in 9.5% of all simulations. The  
181 number of catastrophic epidemics (>2,000,000), generally increased with both RCP and SSP  
182 values up to 3.43% and 3.54% for the RCP6 and RCP8.5 SSP3 scenarios respectively, but  
183 again saw a decrease from the present day level (2.3 %) to 1.19% for just the single ‘best  
184 case’ future scenario (RCP4.5 SSP1).

185 **Discussion:** We show that changes in future expected disease incidence are likely to be  
186 related to the rate of global environmental change. According to our study, EVD mitigation  
187 attempts would be best placed in efforts to reduce both population growth, increase  
188 socioeconomic development and ameliorate climate change, such that global change most  
189 closely tracks the RCP4.5 SSP1 scenario. Global binding commitments to reducing climate  
190 change may act to slow the effects, but evidence (41) suggests a wholesale change is difficult.  
191 Expected decreases in poverty and a concomitant increase in healthcare resources, therefore,  
192 would appear to be the most realistic approaches to reduce the future EVD disease burden.  
193 While vaccinations may be effective, the sporadic nature of spill-over events mean it is  
194 unclear where vaccination should be targeted and whether it would be cost-effective at this  
195 time (35). More generally, increasing health care provision and poverty reduction efforts in  
196 West Africa would not only reduce the potential effects of EVD but also other diseases,



Redding *et al.* Impact of global change on future Ebola emergence and spread.

197 including those that have yet to emerge in earnest, such as Marburg virus disease (42), Lassa  
198 fever (43), and Nipah/Hendra virus infection (44). This, in turn, could limit disease  
199 emergence to local outbreaks, preventing nosocomial infections and acting to prevent  
200 subsequent epidemics.

201 Changes to SSP scenarios, which control levels of poverty and human population size in our  
202 models, had a greater impact than changing the climate and land-use change (here mediated  
203 via RCP scenario). This is not surprising as poverty reduction increases the presumed EVD-  
204 EBOV healthcare response in our simulations, and many of the countries in the endemic  
205 region are expected to have substantial reductions in poverty levels by 2070 (37). Similarly,  
206 contact rates in our simulation (both between humans and between humans and wildlife)  
207 depend linearly on human population growth, whereas climate change increases EVD-EBOV  
208 cases through more complex interactions. Species distribution models indicate that the  
209 presumed wildlife hosts prefer warm and wet conditions (Figs. S1-2), which are expected to  
210 increase in these regions according to the HADGem3-AO climate model (38) (Fig. S5). This  
211 expansion of the optimal conditions for presumed the wildlife host species effectively  
212 increases the at-risk human population by including more of the northern, eastern and  
213 southern areas of Africa (Fig. 3A). Predicted future anthropogenic land-use changes,  
214 however, reduces the optimal wildlife host habitat, thereby reducing human-wildlife  
215 interactions.

216 We identify Nigeria as, not only a key area for epidemics to be initiated, but also an area with  
217 potential for many small outbreaks. This might indicate that our model has not correctly  
218 balanced the impact of healthcare infrastructure on disease spread, regional behavioural  
219 barriers to infection or regional differences in contact rates between both humans and hosts.  
220 Until these additional factors are explicitly tested, the high human density and known

Redding *et al.* Impact of global change on future Ebola emergence and spread.

221 presence of putative wildlife hosts mean that this area should be consider at high risk of  
222 initiating epidemics.

223 There is a pressing need to better understand the spatial variation in other key disease  
224 transmission parameters. For instance, bush-meat hunting is an important process by which  
225 human populations come into contact with large bats resource (45) and the spatial variation in  
226 bush-meat extraction is likely a component of spill-over variation. Little is known, however,  
227 about bush-meat hunting outside a few specific studies but there is potential to use spatial  
228 interpolation techniques to make reasonable predictions in un-sampled areas. Our model does  
229 not incorporate this data or test its impact and, similarly due to lack of data resources, we do  
230 not use information about local differences in funeral practices. Hospital compartments are  
231 thought to be useful to understand quarantine and super-spreading events but there is very  
232 limited data on the quality and geographic reach of small health clinics. Some other important  
233 behavioural trends are not captured in our model, such as the post-outbreak behavioural  
234 reactions of human populations e.g. mass migration away from affected regions. Recent  
235 findings regarding the persistence of Ebola virus in semen of convalescent men may also help  
236 explain the intermittent spatiotemporal patterns of infections in endemic areas (46, 47).  
237 Future work incorporating such data, may further improve the spatial resolution and accuracy  
238 of risk estimates.

239 Our approach demonstrates not only an important framework understanding Ebola but also  
240 for other diseases. Analysing diseases singly cannot be an effective approach for policy  
241 making at a large geopolitical scale, particularly in regions with multi-disease burden and  
242 limited healthcare resources. Net disease risk patterns, when summed across a wide variety of  
243 zoonoses, will be an emergent property of the distribution of very different wildlife host  
244 species and their respective responses to increasing anthropogenic land-use conversion and  
245 climate change. Any lack of data in the short-term does not reduce the obvious importance of

Redding *et al.* Impact of global change on future Ebola emergence and spread.

246 understanding future disease trends. Attempts, such as ours, establish a first heuristic step on  
247 a pathway to building intervention measures aimed at reducing overall future disease burden.

## 248 **Materials and Methods:**

### 249 Environmental Mechanistic Model (EMM) EBOV

250 Using our discrete-time, stochastic epidemiological compartmental model incorporating  
251 spatial environmental variability (30), we extended the approach to not just simulate  
252 pathogen spill-over but also subsequent human-to-human transmission, focusing on the Zaire  
253 Ebola virus (EBOV) (Fig.2). Within grid cells ( $0.0416^\circ$ ) covering continental Africa, we used  
254 a Susceptible, Exposed, Infectious, Funeral and Removed (SEIFR) EVD-EBOV disease  
255 compartmental model (following 13, 19, 23) to estimate the number of individuals per  
256 compartment, in each time step  $t$ , for present day bioclimatic, land use and demographic  
257 conditions. Although some previous compartmental models for EBOV have included a  
258 Hospital compartment (48), adding this complexity was not feasible over large and poorly  
259 known geographical areas. Without knowing more about the spatial variation in health  
260 seeking behaviour, exactly which grid cells contain clinics, and the variation of healthcare  
261 resources in these clinics, adding in this compartment would not likely significantly improve  
262 our model's ability to predict the progression of outbreaks. Furthermore, hospital  
263 interventions had the least impact controlling EVD outbreaks in a recent meta-analysis (24).  
264 All analyses were carried out in R v.3.2.2 (49). Each stage of the EMM simulation is  
265 discussed in more detail below:

#### 266 Stage 1: SEIFR compartmental model within grid cells

267 We used starting EBOV transmission characteristics of incubation time = 7 days, onset of  
268 symptoms to resolution = 9.6 days, case fatality rate (CFR)  $\sigma = 0.78$ , and burial time = 2 days  
269 (23) to parameterize the SEIFR compartmental model to determine transition rates  $\alpha$   
270 (between Exposed to Infectious compartments),  $\gamma_\sigma$  (Infectious to Funeral),  $\gamma_{1-\sigma}$  (Infectious

Redding *et al.* Impact of global change on future Ebola emergence and spread.

271 to Removed), and  $\gamma_F$  (Funeral to Removed) (Fig. 2). To incorporate sensitivity around these  
272 transmission parameters, we allowed values to vary for each simulation run by sampling from  
273 a Gaussian distribution where the mean was their initial value and standard deviation was  
274 fifth of the mean, to give a reasonable spread of values. For each time step  $t$ , the number of  
275 individuals moving between all compartments was estimated by drawing randomly from a  
276 binomial distribution (Section S1 Equation 1), parameterized using the respective  
277 compartmental transition rates. Transition rates for compartments were assumed to be the  
278 same in all grid cells except for the transition between Susceptible to Exposed. The per grid  
279 cell Susceptible to Exposed transition rates were determined by the force of zoonotic  
280 infection  $\lambda_z$ , and the force of infection  $\lambda$  (Fig. 2) and these were calculated as follows:  
281 (a) Force of Zoonotic Infection,  $\lambda_z$ . The force of infection for zoonotic transmission  $\lambda_z$ , per  
282 time step  $t$ , was estimated as the product of the probability of host presence  $H$ , and spill-over  
283 rate  $\kappa$  (Section S1 Equation 2). Without any evidence to the contrary (15, 50), we  
284 parameterized  $H$  by calculating the spatial probability of the presence of the most likely  
285 EBOV reservoir host species based on available data (Old World fruit bat species  
286 *Epomophorus gambianus gambianus*, *Epomops franqueti*, *Hypsignathus monstrosus*, and  
287 *Rousettus aegyptiacus* see Table S1) within each grid cell ( $0.0416^\circ$ ) across the African  
288 continent using species distribution models (SDMs) (51) and assuming constant pathogen  
289 prevalence. We also calculated the spatial probability of the presence of other species which  
290 are known to provide an alternative route of infection, but likely do not act as reservoirs  
291 (*Gorilla spp.*, *Pan spp.*, and *Cephalophus spp.*) (12). SDMs for each species were inferred  
292 using boosted regression trees (BRT) using distribution data from the Global Biodiversity  
293 Information Facility (GBIF) (52) and 11 present day bioclimatic and land use variables  
294 (Table S2). Data with coarse scale GBIF spatial coordinates (decimal degree coordinates with  
295 less than four decimal places) were filtered out of the analysis. To reduce spatial

Redding *et al.* Impact of global change on future Ebola emergence and spread.

296 autocorrelation and duplicate records, any records that co-occurred in the same grid cell were  
297 removed. Lastly, GBIF records older than 1990 were discarded to ensure samples more  
298 closely matched the current landscapes. BRT tree complexity was set at 5 reflecting the  
299 suggested value and the learning rate was adjusted until  $>1000$  trees were selected (53). A  
300 total of 25 models were estimated for each species using four fifths of the distribution data as  
301 a training dataset and one fifth as a testing dataset, chosen randomly for each model. Those  
302 with the highest predictive ability (high area under operating curve, AUC and true-skill  
303 statistic, TSS values) were selected as the best model for each species (Fig. S1). The most  
304 important spatial variables determining distributions across the different reservoir host  
305 species were BIO7 Temperature Annual Range, BIO13 Precipitation of Wettest Month, BIO2  
306 Mean Diurnal Temperature Range and Land Use-Land Cover (Fig. S2). The outputs from all  
307 putative reservoir (bat) species were combined into a single value representing the probability  
308 of any reservoir species being present and a similar approach was taken for the non-reservoir  
309 host species. The reservoir and non-reservoir host layers were then combined, but since only  
310 a third of index cases were attributed to non-reservoir host spill-overs (10), we down-  
311 weighted the probability of the non-reservoir occurrence by two thirds and reservoir  
312 occurrence by one third when combining the layers. The final resulting probability was  
313 bounded by zero and one. Additionally, as EBOV presence in non-reservoir host species is  
314 impossible without the presence of reservoir hosts, cells with a reservoir host probability of  
315 zero were given a value of zero irrespective of the non-reservoir host score. For  
316 computational simplicity, we assume that all human individuals have equal chance of  
317 exposure to infected host species. The initial value used for spill-over rate  $\kappa$ , per time step  $t$ ,  
318 was estimated from the number of historic outbreaks  $O$  (defined here as distinct clusters of  
319 cases) (taken from empirical EBOV outbreak data 12), and the number of historically  
320 susceptible individuals  $S_h$  (inferred from human population estimates from 1976 to 2015 from

Redding *et al.* Impact of global change on future Ebola emergence and spread.

321 37) (see Section S1 Equation 3). During each simulation run,  $\kappa$  was allowed to vary using the  
322 same method as the compartmental transmission parameters above.

323 (b) Force of Infection,  $\lambda$ . The force of infection for human-to-human transmission  $\lambda$  per time  
324 step  $t$ , was estimated as the product of the effective contact rate  $\beta$ , and the number of  
325 individuals that can transmit the disease in each relevant compartment (*Infectious and*  
326 *Funeral*) per grid cell ( $0.0416^\circ$ ) (Section S1 Equation 4). We assumed that  $\beta$  for the  
327 *Infectious* and *Funeral* compartments was equivalent, due to the contact rates of moving  
328 individuals in the *Infectious* compartment being offset by large aggregations of individuals at  
329 funerals. We estimated the effective contact rate  $\beta$ , as the basic reproduction number  $R_0$   
330 divided by the product of the total number of individuals  $N$ , and infectious duration  $D$  (the  
331 sum of *Infectious* and *Funeral* compartment time, 11 days taken from 23). As a starting value  
332 for  $R_0$  we used a value of 1.7 (54) and this was allowed to vary per simulation run using the  
333 same method as the compartmental transmission parameters above. As per previous  
334 research(30), we incorporated spatial variance in contact rates among grid cells using a  
335 weighting factor  $m$ , whereby the effective contact rate in grid cells with greater than expected  
336 contact rates was increased and decreased where fewer contacts were predicted (Section S1  
337 Equation 5). We estimated  $m$  by creating an ideal free gas model of human movement within  
338 each grid cell and approximated collision frequency per person per day, using the following:  
339 the total individuals in each grid cell (estimated from Gridded Population of the World v3  
340 55), an individual interaction sphere of radius 0.5 m, and using per person, daily walking  
341 distances in meters  $v\Delta t$ , where  $v$  is walking velocity, and  $\Delta t$  equals time period (Section S1  
342 Equation 6). To capture geographic variation in human movement patterns, each grid cell was  
343 assigned a value for per person daily walking distance, based on the empirical relationship  
344 between daily walking distances and per person per country Gross Domestic Product  
345 (measured as Purchasing Power Parity from 37) (Table S3). As the availability of mass transit

Redding *et al.* Impact of global change on future Ebola emergence and spread.

346 as alternative to walking tends to be centrally controlled, we assumed that grid cells in each  
347 country had the same value.

348 Under real conditions, the effective reproduction number  $R_e$  decays over time as both efforts  
349 are made to control disease spread and as the pool of susceptible reduces, which results in  $R_0$   
350 being equal to  $R_e$  only when time step  $t$  is zero. Therefore, to calculate effective contact rate  
351  $\beta$ , we allowed  $R_e$  to decay per time step  $t$  (Section S1 Equations 7, 8 and 9). However,  
352 countries that can invest more in health infrastructure (e.g., barrier nursing, surveillance)  
353 should see a more rapid reduction in  $R_e$  over time compared to countries that do not have such  
354 infrastructure and also a concomitantly, a decrease in CFR. Therefore we derived an  
355 empirical estimate of the relationship between wealth (measured using GDP-PPP per capita)  
356 and both the relative rate of decay of  $R_e$  over time (Section S1 Equation 10) and CFR (Section  
357 S1 Equation 11), and using a spatially disaggregated poverty data layer (56) we weighted the  
358 per grid cell per time step  $R_e$  reduction and CFR accordingly to the values in each grid cell.

359 While we found the relationship between wealth and both  $R_e$  and CFR reduction over time to  
360 be best described using curves with exponents of -0.08 and -0.02, respectively, this was  
361 inferred using relatively few data points (Table S4). In our simulation runs, therefore, we  
362 allowed these exponents to vary similarly to the parameters above, to allow either more linear  
363 declines or deeper curves to best estimate the true impact of this relationship.

#### 364 Stage 2: SEIFR compartmental model between grid cells

365 We allowed those individuals that had contracted EBOV to travel between grid cells,  
366 specifically individuals in Exposed and Infectious (but not Funeral) compartments (Fig. 2),  
367 but assumed for simplicity that the overall net movement of susceptible individuals between  
368 cells was zero. As previously supported with empirical data, we employed a movement  
369 model that was weighted by both geographic distance and human density (31, 33) and was  
370 also geographically constrained to known transportation routes. The transmission rate  $\varepsilon$ , of



Redding *et al.* Impact of global change on future Ebola emergence and spread.

371 individuals between target compartments of different grid cells was estimated by two  
372 different methods: between grid cells along road networks  $\varepsilon_r$ , and along flight routes  $\varepsilon_f$ . We  
373 sampled randomly, from a binomial distribution, the number of travellers per grid cell and  
374 time step  $t$  (Section S1 Equation 1) with the probability of travel by road per day  $\varepsilon_r$ , being  
375 proportional to the distance to the nearest road using the Global Roads Open Access Data Set  
376 (Global Roads Open Access Data Set from 57). Global roads dataset contains in total 585413  
377 routes from tracks to multi-lane highways and has been extensively validated for Africa (58).  
378 We allowed travellers to move freely (agnostic to any particular transportation method or  
379 country boundary) across the continent up to 10 road junctions in any direction from the  
380 centroid of the starting cell along the road network (Global Roads Open Access Data Set  
381 from 57), giving a potential of up to 500 km of linear travel per time step. Each proposed  
382 travel end point was given an individual probability from the daily distance travelled  
383 probability curve from (Fig. 2(f) of 59), which is derived from transport data and validated  
384 against mobile phone data. For air travel, we set the potential pool of travellers as the  
385 individuals in grid cells containing airports across the world (from Open Flights Airport  
386 Database 60) plus all the Exposed individuals in the 8 grid cells surrounding each airport grid  
387 cell. We sampled randomly from a binomial distribution the number of travellers per grid cell  
388 and time step  $t$  (Section S1 Equation 1) with the probability of travel by air per day  $\varepsilon_f$ , being  
389 proportional to the total number of flights per day divided by the population of that country  
390 (37). We allowed travellers to move up to 2 edges on the current airline routes from airport  
391 origin using the (from Open Flights Airport Database 60). This approximates a traveller  
392 taking either a one or two-legged journey. Final destinations were sampled at random, based  
393 on all potential air routes having equal priority, but in most cases potential destinations were  
394 located nearby which by default meant that more distance travel was less likely than travel to  
395 a nearby location. For both road and air travellers, individuals were then added to the correct



Redding *et al.* Impact of global change on future Ebola emergence and spread.

396 compartment of their final destination in the new grid cell and removed from the same  
397 compartment from the original source grid cell.

398 Stage 3: Impact of future anthropogenic change

399 (a) Future force of zoonotic infection  $\lambda_z$ . We recalculated values of the force of zoonotic  
400 infection  $\lambda_z$ , by estimating the probability of EBOV host presence,  $H_{2070}$  under several  
401 different future integrated scenarios that incorporate projections of bioclimatic and land use  
402 variables (Table S2). Estimates of bioclimatic variables for 2070 were based on the  
403 HADGem3-AO climate model (61) under three Representative Concentration Pathways:  
404 RCP4.5, RCP6, and RCP8.5 (RCP45, RCP60 and RCP85 40). To estimate host presence  
405 probability in the future we needed to predict fine-scale future habitat data under the RCP  
406 scenarios. As only coarse categorisations are currently available (62), we therefore separately  
407 empirically estimated future land use-land cover (LULC) change (using MODIS data 36).  
408 For each grid cell we calculated the probability of each possible LULC change within the  
409 2001-2012 MODIS dataset within a surrounding 5x5 cell grid using satellite data from 20.  
410 Based on these probabilities we simulated yearly LULC change across the region of interest  
411 for each grid cell from 2012 until 2070, and ran this simulation 100 times to create a bank of  
412 future possible landscapes, which were then summarized into three consensus landscapes  
413 representing low (with anthropogenic changes rejected where possible) , medium (by  
414 choosing the majority consensus across all 100 runs) and high anthropogenic change,  
415 (anthropogenic changes were chosen if available across the landscape) and we aligned these  
416 three scenarios to SSP1, SSP2 and SPP3 respectively.

417 (b) Future force of infection  $\lambda$ . Using predicted human demographic variables and poverty  
418 levels for 2070, we recalculated values for the force of infection  $\lambda$ , by estimating the number  
419 of individuals per grid cell,  $n$  and effective reproduction number,  $R_e$ . We inferred human  
420 population estimates per grid cell for 2070 by using the Gridded Population of the World v4

Redding *et al.* Impact of global change on future Ebola emergence and spread.

421 (55) for present day and multiplying each cell by the expected future proportional change  
422 over that time period predicted by three Shared Socio-economic Pathways: SSP1, SSP2 and  
423 SSP3. Future poverty estimates per country were similarly inferred using a spatially-  
424 disaggregated GDP layer (63) multiplied by the expected change in per country GDP over the  
425 time period as predicted by the SSP integrated scenario. We note that as our travel probability  
426 is defined per person, increasing future populations will see a proportion increase in the  
427 amount of both road and air travel.

428 (c) Comparison of simulation runs. We reran the EMM simulations under 5 plausible  
429 combinations of 2070 future environmental-socioeconomic scenarios of global change and  
430 greenhouse gas concentrations: RCP4.5/SSP1, RCP4.5/SSP2, RCP6/SSP2, RCP6/SSP3,  
431 RCP8.5/SSP3 (64). These different input data options were, specifically: (i) RCP 4.5 -  
432 stabilization scenario in which total radiative forcing is stabilized shortly after 2100, (ii) RCP  
433 6 - stabilization scenario in which total radiative forcing is stabilized shortly after 2100,  
434 without overshoot, by the application of a range of technologies and strategies for reducing  
435 greenhouse gas emissions (iii) RCP 8 – worsening scenarios with increasing greenhouse gas  
436 emissions over time, leading to high greenhouse gas concentration levels, (iv) SSP1 – high  
437 regional cooperation, low population growth due high education and high GDP growth, (v)  
438 SSP2 – a ‘processes as usual’ scenario with ongoing levels of population growth and wealth,  
439 with medium estimates for both these by 2070, and (vi) SSP3 – regional antagonism, high  
440 population growth, unsustainable resource extraction and low economic growth. For each of  
441 the six scenarios we aimed for 2500 runs of 365 days, each day measuring the number of  
442 spill-overs, the number of secondary cases associated with each spill-over, and the  
443 geographical areas affected. This allowed us to measure likelihood of spill-overs leading to  
444 small, medium and very large outbreaks, and also to determine the geographical areas with

Redding *et al.* Impact of global change on future Ebola emergence and spread.

445 the highest risk of experiencing cases. We also noted the destination of any flights out of  
446 Africa that contained infected people.

447 **Acknowledgments:** This work, Dynamic Drivers of Disease in Africa Consortium, NERC  
448 project no. NE-J001570-1 was funded with support from the Ecosystem Services for Poverty  
449 Alleviation Programme (ESPA). The ESPA programme is funded by the Department for  
450 International Development (DFID), the Economic and Social Research Council (ESRC) and  
451 the Natural Environment Research Council (NERC). AAC is additionally supported by a  
452 Royal Society Wolfson Research Merit Award. We thank Prabu Sivasubramaniam for  
453 technical assistance, and A., Jones, M. Wilson, G. Mace, M. Leach, and C. Watts for  
454 comments on previous versions of the manuscript. All simulation data are available on  
455 figshare ([figshare.com/s/c41c50a0675311e5b6b306ec4bbcf141](https://figshare.com/s/c41c50a0675311e5b6b306ec4bbcf141)) and the supplementary  
456 materials contain all other data. D.W.R. and K.E.J. developed the overall study design.  
457 D.W.R. carried out the modelling and data processing with assistance from K.E.J. All authors  
458 contributed to writing the manuscript. The authors declare no competing financial interests.

459 **References:**

- 460 1. Whitmee S, *et al.* (2015) Safeguarding human health in the Anthropocene epoch:  
461 report of The Rockefeller Foundation–Lancet Commission on planetary health. *The*  
462 *Lancet* 386: 1973-2028.
- 463 2. Civitello DJ, *et al.* (2015) Biodiversity inhibits parasites: Broad evidence for the  
464 dilution effect. *Proceedings of the National Academy of Sciences* 112:8667-8671.
- 465 3. Costello A, *et al.* (2009) Managing the health effects of climate change. *The Lancet*  
466 373(9676):1693-1733.
- 467 4. Lafferty KD (2009) Calling for an ecological approach to studying climate change  
468 and infectious diseases. *Ecology* 90:932-933.
- 469 5. Keesing F, *et al.* (2010) Impacts of biodiversity on the emergence and transmission of  
470 infectious diseases. *Nature* 468:647-652.
- 471 6. Taylor LH, Latham SM, & Woolhouse ME (2001) Risk factors for human disease  
472 emergence. *Philosophical Transactions of the Royal Society London, Series B:*  
473 *Biological Sciences* 29:983-989.
- 474 7. Grace D, *et al.* (2012) Mapping of poverty and likely zoonoses hotspots.  
475 (International Livestock Research Institute, Nairobi, Kenya).
- 476 8. Hotez PJ, Fenwick A, Savioli L, & Molyneux DH (2009) Rescuing the bottom billion  
477 through control of neglected tropical diseases. *The Lancet* 373(9674):1570-1575.

Redding *et al.* Impact of global change on future Ebola emergence and spread.

- 478 9. Hotez PJ, *et al.* (2007) Control of neglected tropical diseases. *New England Journal of*  
479 *Medicine* 357(10):1018-1027.
- 480 10. Alexander KA, *et al.* (2015) What factors might have led to the emergence of Ebola  
481 in West Africa? *PLoS Neglected Tropical Diseases* 9:e0003652.
- 482 11. Centre for Disease Control (2015) 2014 Ebola Outbreak in West Africa.
- 483 12. Pigott DM, *et al.* (2014) Mapping the zoonotic niche of Ebola virus disease in Africa.  
484 *eLife* 3:e04395.
- 485 13. Legrand J, Grais RF, Boelle P-Y, Valleron A-J, & Flahault A (2007) Understanding  
486 the dynamics of Ebola epidemics. *Epidemiology and Infection* 135:610-621.
- 487 14. Leroy EM, *et al.* (2005) Fruit bats as reservoirs of Ebola virus. *Nature* 438:575-576.
- 488 15. Leendertz SAJ (2016) Testing New Hypotheses Regarding Ebolavirus Reservoirs.  
489 *Viruses* 8(2):30.
- 490 16. Pigott DM, *et al.* (2016) Updates to the zoonotic niche map of Ebola virus disease in  
491 Africa. *eLife* 5:e16412.
- 492 17. Mickleburgh SP, Hutson AM, & Racey PA (1992) Old World fruit bats. *An action*  
493 *plan for their conservation*. Gland, Switzerland: IUCN.
- 494 18. Chowell G, Hengartner NW, Castillo-Chavez C, Fenimore PW, & Hyman JM (2004)  
495 The basic reproductive number of Ebola and the effects of public health measures:  
496 The cases of Congo and Uganda. *Journal of Theoretical Biology* 229:119-126.
- 497 19. Kiskowski MA (2014) A three-scale network model for the early growth dynamics of  
498 2014 west Africa ebola epidemic. PLoS Currents. doi:  
499 10.1371/currents.outbreaks.c6efe8274dc55274f05cbcb62bbe6070.
- 500 20. Weitz JS & Dushoff J (2015) Post-death Transmission of Ebola: Challenges for  
501 Inference and Opportunities for Control. *Scientific Reports* 5:8751.
- 502 21. Althaus CL, Low N, Musa EO, Shuaib F, & Gsteiger S (2015) Ebola virus disease  
503 outbreak in Nigeria: transmission dynamics and rapid control. *Epidemics* 11:80-84.
- 504 22. Nishiura H & Chowell G (2014) Early transmission dynamics of Ebola virus disease  
505 (EVD), West Africa, March to August 2014. *Eurosurveillance* 19:20894.
- 506 23. Valdez LD, Aragão Rêgo HH, Stanley HE, & Braunstein LA (2015) Predicting the  
507 extinction of Ebola spreading in Liberia due to mitigation strategies. *Scientific*  
508 *Reports* 5:12172.
- 509 24. Li S-L, *et al.* (2017) Essential information: Uncertainty and optimal control of Ebola  
510 outbreaks. *Proceedings of the National Academy of Sciences* 114(22):5659-5664.
- 511 25. Alexander KA, *et al.* (2015) What factors might have led to the emergence of Ebola  
512 in West Africa? *PLoS Neglected Tropical Diseases* 9(6):e0003652.
- 513 26. Iacono GL, *et al.* (In Review) The environmental limits of Rift Valley Fever revealed  
514 using eco-epidemiological mechanistic models. *PROCEEDINGS OF THE*  
515 *NATIONAL ACADEMY OF SCIENCES*.
- 516 27. Pourrut X, *et al.* (2009) Large serological survey showing cocirculation of Ebola and  
517 Marburg viruses in Gabonese bat populations, and a high seroprevalence of both  
518 viruses in *Rousettus aegyptiacus*. *BMC Infectious Diseases* 9:159.
- 519 28. Bogoch II, *et al.* (2016) Potential for Zika virus introduction and transmission in  
520 resource-limited countries in Africa and the Asia-Pacific region: a modelling study.  
521 *The Lancet Infectious Diseases* 16(11):1237-1245.
- 522 29. Messina JP, *et al.* (2016) Mapping global environmental suitability for Zika virus.  
523 *Elife* 5:e15272.
- 524 30. Redding DW, Moses LM, Cunningham AA, Wood J, & Jones KE (2016)  
525 Environmental-mechanistic modelling of the impact of global change on human  
526 zoonotic disease emergence: a case study of Lassa fever. *Methods in Ecology and*  
527 *Evolution* 7(6):646-655.

Redding *et al.* Impact of global change on future Ebola emergence and spread.

- 528 31. Dudas G, *et al.* (2017) Virus genomes reveal factors that spread and sustained the  
529 Ebola epidemic. *Nature* 544(7650):309-315.
- 530 32. Mayhew, M. (2017) World Bank Group Ebola Response Fact Sheet.  
531 (<http://www.worldbank.org/en/topic/health/brief/world-bank-group-ebola-fact-sheet>)
- 532 33. Kramer AM, *et al.* (2016) Spatial spread of the West Africa Ebola epidemic. *Royal*  
533 *Society Open Science* 3(8):160294.
- 534 34. Garchitorena A, *et al.* (2017) Disease ecology, health and the environment: a  
535 framework to account for ecological and socio-economic drivers in the control of  
536 neglected tropical diseases. *Philosophical Transactions of the Royal Society London,*  
537 *Series B: Biological Sciences* 372(1722):20160128.
- 538 35. Henao-Restrepo AM, *et al.* (2015) Efficacy and effectiveness of an rVSV-vectored  
539 vaccine expressing Ebola surface glycoprotein: interim results from the Guinea ring  
540 vaccination cluster-randomised trial. *The Lancet* 386(9996):857-866.
- 541 36. Friedl MA, *et al.* (2010) MODIS Collection 5 global land cover: Algorithm  
542 refinements and characterisation of new datasets. *Remote Sensing of the Environment*  
543 114:168-182.
- 544 37. World Bank (2014) *World Development Indicators* (World Bank, Washington DC,  
545 USA).
- 546 38. Bellouin N, *et al.* (2011) The HadGEM2 family of met office unified model climate  
547 configurations. *Geoscientific Model Development* 4(3):723-757.
- 548 39. Riahi, K. (2013). Preliminary IAM scenarios based on the RCP/SSP framework.  
549 Climate Change Impacts/Integrated Assessment XIX.
- 550 40. van Vuuren D, *et al.* (2011) The representative concentration pathways: an overview.  
551 *Climatic Change* 109(1-2):5-31.
- 552 41. Tompkins EL & Adger WN (2005) Defining response capacity to enhance climate  
553 change policy. *Environmental Science & Policy* 8(6): 562-571.
- 554 42. MacNeil A & Rollin PE (2012) Ebola and marburg hemorrhagic fevers: Neglected  
555 Preliminary IAM scenarios based on the RCP/SSP framework tropical diseases? *PLoS*  
556 *Neglected Tropical Diseases* 6:1-7.
- 557 43. Ogbu O, Ajuluchukwu E, & Uneke CJ (2007) Lassa fever in West African sub-  
558 region: an overview. *Journal of Vector Borne Diseases* 44:1-11.
- 559 44. Daszak P, *et al.* (2013) Interdisciplinary approaches to understanding disease  
560 emergence: the past, present, and future drivers of Nipah virus emergence.  
561 *Proceedings of the National Academy of Sciences* 110:3681-3688.
- 562 45. Mickleburgh S, Waylen K, & Racey P (2009) Bats as bushmeat: a global review.  
563 *Oryx* 43(02):217-234.
- 564 46. Deen GF, *et al.* (2015) Ebola RNA persistence in semen of Ebola virus disease  
565 survivors—preliminary report. *New England Journal of Medicine* doi:  
566 10.1056/NEJMoa1511410
- 567 47. Mackay IM & Arden KE (2015) Ebola virus in the semen of convalescent men. *The*  
568 *Lancet Infectious Diseases* 15(2):149-150.
- 569 48. Rivers CM, Lofgren ET, Marathe M, Eubank S, & Lewis BL (2014) Modeling the  
570 impact of interventions on an epidemic of Ebola in Sierra Leone and Liberia. *arXiv*  
571 *preprint arXiv:1409.4607*.
- 572 49. R Development Core Team (2009) R: A language and environment for statistical  
573 computing (R Foundation for Statistical Computing, Vienna, Austria).
- 574 50. Leendertz SAJ, Gogarten JF, Düx A, Calvignac-Spencer S, & Leendertz FH (2016)  
575 Assessing the evidence supporting fruit bats as the primary reservoirs for Ebola  
576 viruses. *EcoHealth* 13(1):18-25.



Redding *et al.* Impact of global change on future Ebola emergence and spread.

- 577 51. Phillips S, Anderson RP, & Schapire R (2006) Maximum entropy modelling of  
578 species geographic distribution. *Ecological Modelling* 190:231-259.
- 579 52. Global Biodiversity Information Facility (2013) Global Biodiversity Information  
580 Facility. (<http://www.gbif.org/>).
- 581 53. Elith J, *et al.* (2006) Novel methods improve prediction of species' distributions from  
582 occurrence data. *Ecography* 29:129–151.
- 583 54. Althaus CL (2014) Estimating the reproduction number of Ebola virus (EBOV)  
584 during the 2014 outbreak in West Africa. *arXiv preprint arXiv:1408.3505*.
- 585 55. CIESIN (2005) Gridded Population of the World Version 3 (GPWv3): Population  
586 Grids. (NASA Socioeconomic Data and Applications Center (SEDAC), Palisades  
587 NY).
- 588 56. Ghosh T, *et al.* (2010) Shedding light on the global distribution of economic activity.  
589 *The Open Geography Journal* 3(1).
- 590 57. CIESIN (2013) Global Roads Open Access Data Set, Version 1 (gROADSv1). .  
591 (NASA Socioeconomic Data and Applications Center (SEDAC), Palisades NY).
- 592 58. CIESIN (2013) Methods Used in the Development of the Global Roads Open Access  
593 Data Set (gROADS), version 1. (NASA Socioeconomic Data and Applications  
594 Center (SEDAC), Palisades NY).
- 595 59. Merler S & Ajelli M (2010) The role of population heterogeneity and human mobility  
596 in the spread of pandemic influenza. *Proceedings of the Royal Society B: Biological  
597 Sciences* 277:557-565.
- 598 60. OpenFlights (2012) OpenFlights Airports Database. (<http://openflights.org>).
- 599 61. Hewitt HT, *et al.* (2011) Design and implementation of the infrastructure of  
600 HadGEM3: the next-generation Met Office climate modelling system. *Geoscientific  
601 Model Development* 4:223-253.
- 602 62. Hurtt GC, *et al.* (2011) Harmonization of land-use scenarios for the period 1500–  
603 2100: 600 years of global gridded annual land-use transitions, wood harvest, and  
604 resulting secondary lands. *Climatic change* 109(1-2):117.
- 605 63. Elvidge CD, *et al.* (2009) A global poverty map derived from satellite data.  
606 *Computers & Geosciences* 35(8):1652-1660.
- 607 64. Kriegler E, *et al.* (2014) A new scenario framework for climate change research: the  
608 concept of shared climate policy assumptions. *Climatic Change* 122(3):401-414.
- 609 65. Hutchinson J & Waser PM (2007) Use, misuse and extensions of “ideal gas” models  
610 of animal encounter. *Biological Reviews* 3:335-359.
- 611 66. Pigott DM, *et al.* (2014) Mapping the zoonotic niche of Ebola virus disease in Africa.  
612 *Elife* 3:e04395.
- 613 67. Wilson DE & Reeder DM eds (2005) *Mammal Species of the World. A Taxonomic  
614 and Geographic Reference* (John Hopkins University Press, Baltimore), 3rd Edition  
615 Ed, Vol 1.
- 616 68. Weiß aus Karlsruhe S (2013) Identification and characterisation of emerging viruses  
617 in free-ranging bats from sub-Saharan Africa. EngD Thesis (Technical University of  
618 Berlin, Berlin, Germany).
- 619 69. Hayman DTS, *et al.* (2010) Long-Term Survival of an Urban Fruit Bat Seropositive  
620 for Ebola and Lagos Bat Viruses. *PloS One* 5:e11978.
- 621 70. Hayman DTS, *et al.* (2012) Ebola virus antibodies in fruit bats, Ghana, West Africa.  
622 *Emerging Infectious Diseases* 18:1207-1209.
- 623 71. Hijmans RJ, Cameron SE, Parra JL, Jones PG, & Jarvis A (2005) Very high  
624 resolution interpolated climate surfaces for global land areas. *International Journal of  
625 Climatology* 25:1965-1978.

Redding *et al.* Impact of global change on future Ebola emergence and spread.

- 626 72. Jarvis, A., Reuter, H. I., Nelson, A., & Guevara, E. (2008). Hole-filled SRTM for the  
627 globe Version 4. available from the CGIAR-CSI SRTM 90m Database (<http://srtm.csi.cgiar.org>).
- 628
- 629 73. Barreira TV, Rowe DA, & Kang M (2010) Original Research Parameters of Walking  
630 and Jogging in Healthy Young Adults. *International Journal of Exercise Science*  
631 3(1):4-13.
- 632 74. Hallal PC, *et al.* (2012) Global physical activity levels: surveillance progress, pitfalls,  
633 and prospects. *The Lancet* 380(9838):247-257.
- 634 75. Filmer D (2004) *If You Build It, Will They Come? School Availability and School*  
635 *Enrollment in 21 Poor Countries* (The World Bank) p 25.
- 636 76. Cook I, Alberts M, & Lambert EV (2008) Relationship between adiposity and  
637 pedometer-assessed ambulatory activity in adult, rural African women. *International*  
638 *Journal of Obesity* 32(8):1327-1330.
- 639 77. Marlowe F (2010) *The Hadza: Hunter-gatherers of Tanzania* (University of  
640 California Press).
- 641 78. BASSETT DRJ, WYATT HR, THOMPSON H, PETERS JC, & HILL JO (2010)  
642 Pedometer-Measured Physical Activity and Health Behaviors in U.S. Adults.  
643 *Medicine & Science in Sports & Exercise* 42(10):1819-1825.
- 644 79. Chowell G & Nishiura H (2014) Transmission dynamics and control of Ebola virus  
645 disease (EVD): a review. *BMC medicine* 12(1):196.
- 646 80. Lefebvre A, *et al.* (2014) Case fatality rates of Ebola virus diseases: a meta-analysis  
647 of World Health Organization data. *Médecine et Maladies Infectieuses* 44(9):412-416.
- 648 81. Kucharski AJ & Edmunds WJ (2014) Case fatality rate for Ebola virus disease in west  
649 Africa. *The Lancet* 384(9950):1260.
- 650 82. Fasina FO, *et al.* (2014) Transmission dynamics and control of Ebola virus disease  
651 outbreak in Nigeria, July to September 2014. *European Surveillance* 19(40):20920.
- 652 83. Rouquet P, *et al.* (2005) Wild animal mortality monitoring and human Ebola  
653 outbreaks, Gabon and Republic of Congo, 2001–2003. *Emerging Infectious Diseases*  
654 11(2):283.
- 655 84. Team WER (2014) Ebola virus disease in West Africa—the first 9 months of the  
656 epidemic and forward projections. *New England Journal of Medicine*  
657 2014(371):1481-1495.
- 658 85. Towers S, Patterson-Lomba O, & Castillo-Chavez C (2014) Temporal variations in  
659 the effective reproduction number of the 2014 West Africa Ebola outbreak. *PLoS*  
660 *Currents* doi: 10.1371/currents.outbreaks.9e4c4294ec8ce1adad283172b16bc908
- 661 86. Althaus CL (2014) Estimating the reproduction number of Ebola virus (EBOV)  
662 during the 2014 outbreak in West Africa. *PLoS Currents* doi:  
663 10.1371/currents.outbreaks.91afb5e0f279e7f29e7056095255b288

664  
665

666

Redding *et al.* Impact of global change on future Ebola emergence and spread.

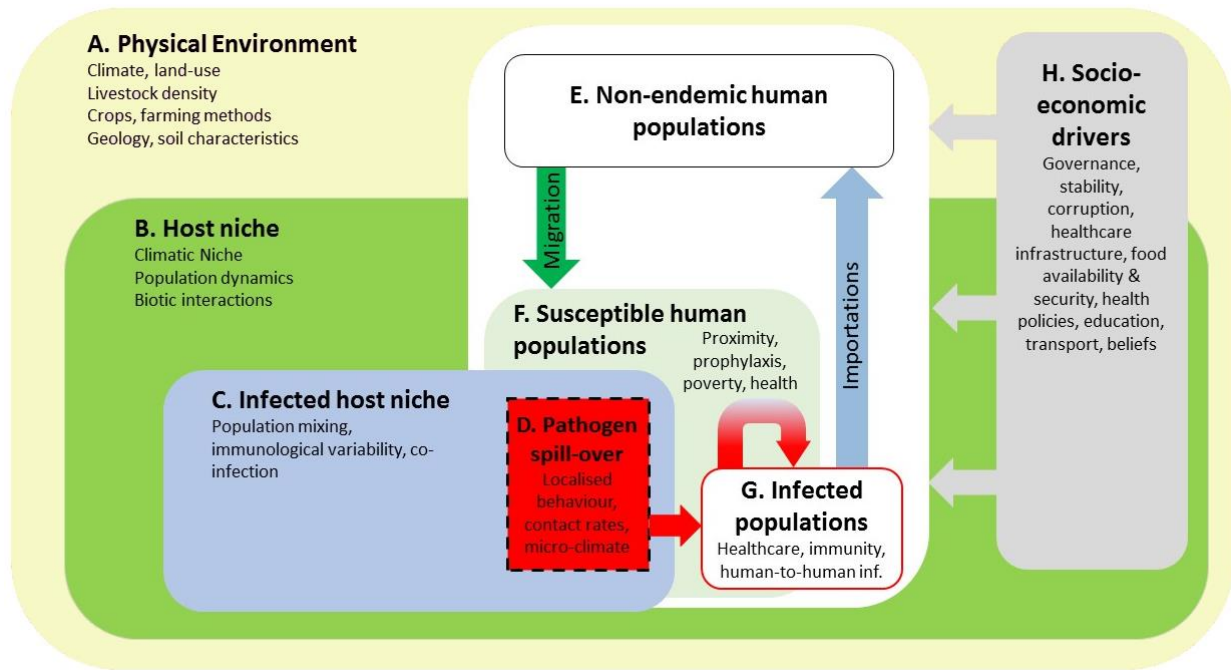

667

668 **Fig. 1. System-dynamics model of zoonotic disease transmission.** Letters A-H indicate

669 major system components, arrows showing links, and key sub-components in smaller font.

670



Redding *et al.* Impact of global change on future Ebola emergence and spread.

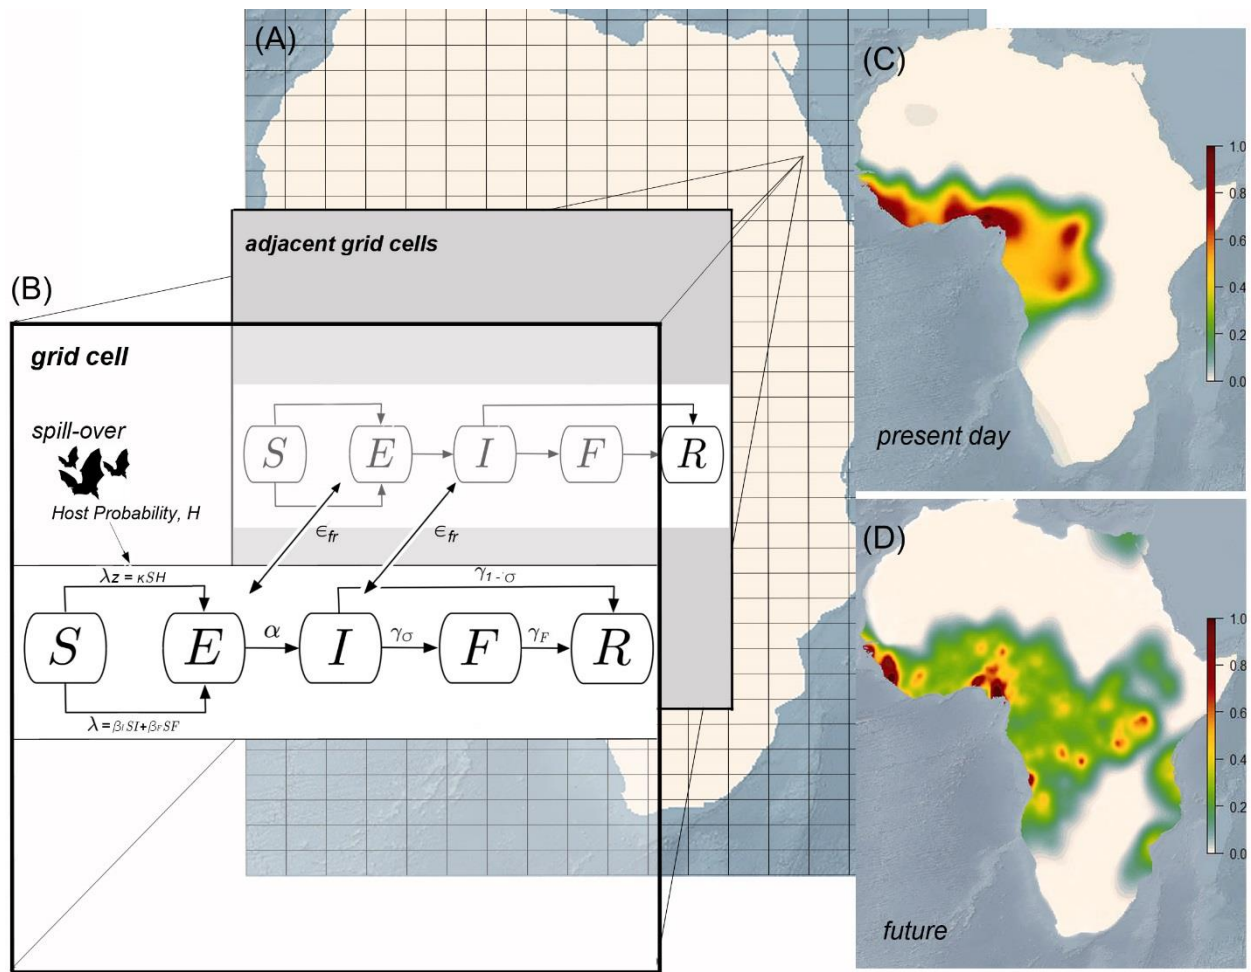

671

672 **Fig. 2. Predictive Integrated Zoonotic Model (EMM) EBOV Simulation Schematic.**

673 Within  $0.0416^\circ$  grid cells across the globe (A), we used a *SEIFR* (*Susceptible, Exposed,*  
 674 *Infectious, Funeral and Removed*) disease compartmental model (B), to estimate the number  
 675 of people in each compartment. *S-E* transmission rate was determined for each grid cell by  
 676 calculating the force of zoonotic infection (between hosts and humans)  $\lambda_z$ , and within human  
 677 populations  $\lambda$  (see Materials and Methods). Travel of exposed or infectious individuals  
 678 between grid cells occurred across existing road and flight transport networks, with  
 679 transmission rate  $\epsilon_{fr}$ . Mean transition rates used as the starting parameters for simulations  
 680 were as follows:  $\alpha$  for *E-I* was calculated as the reciprocal of incubation time in days ( $\alpha=$   
 681  $1/7$ ),  $\gamma_\sigma$  (*I-F* transition rate) was the product of the probability of the reciprocal of days  
 682 infectious ( $\gamma=1/9.6$ ) and poverty-weighted case fatality rate ( $\sigma=0.78$ ),  $\gamma_{1-\sigma}$  (*I-R* transition

Redding *et al.* Impact of global change on future Ebola emergence and spread.

683 rate) was the product of the probability of the reciprocal of days infectious ( $\gamma=1/9.6$ ) and  
684 probability of recovering ( $1-\sigma$ ), and  $\gamma_F$  (F-R transition rate) was the reciprocal of the burial  
685 time of 2 days. Each simulation was run 2500 times for 365 days in each grid cell containing  
686 a human population. The total number of people in each compartment per grid cell, per day  
687 from each simulation was then used to calculate the total number of index and secondary  
688 cases and mapped spatially (**C**). Bioclimatic, land use and demographic conditions were then  
689 changed to predicted values for 2070 to estimate changes to  $\lambda$  and  $\lambda_z$ , and the simulations  
690 repeated to investigate impacts of global change on disease (**D**).

Redding *et al.* Impact of global change on future Ebola emergence and spread.

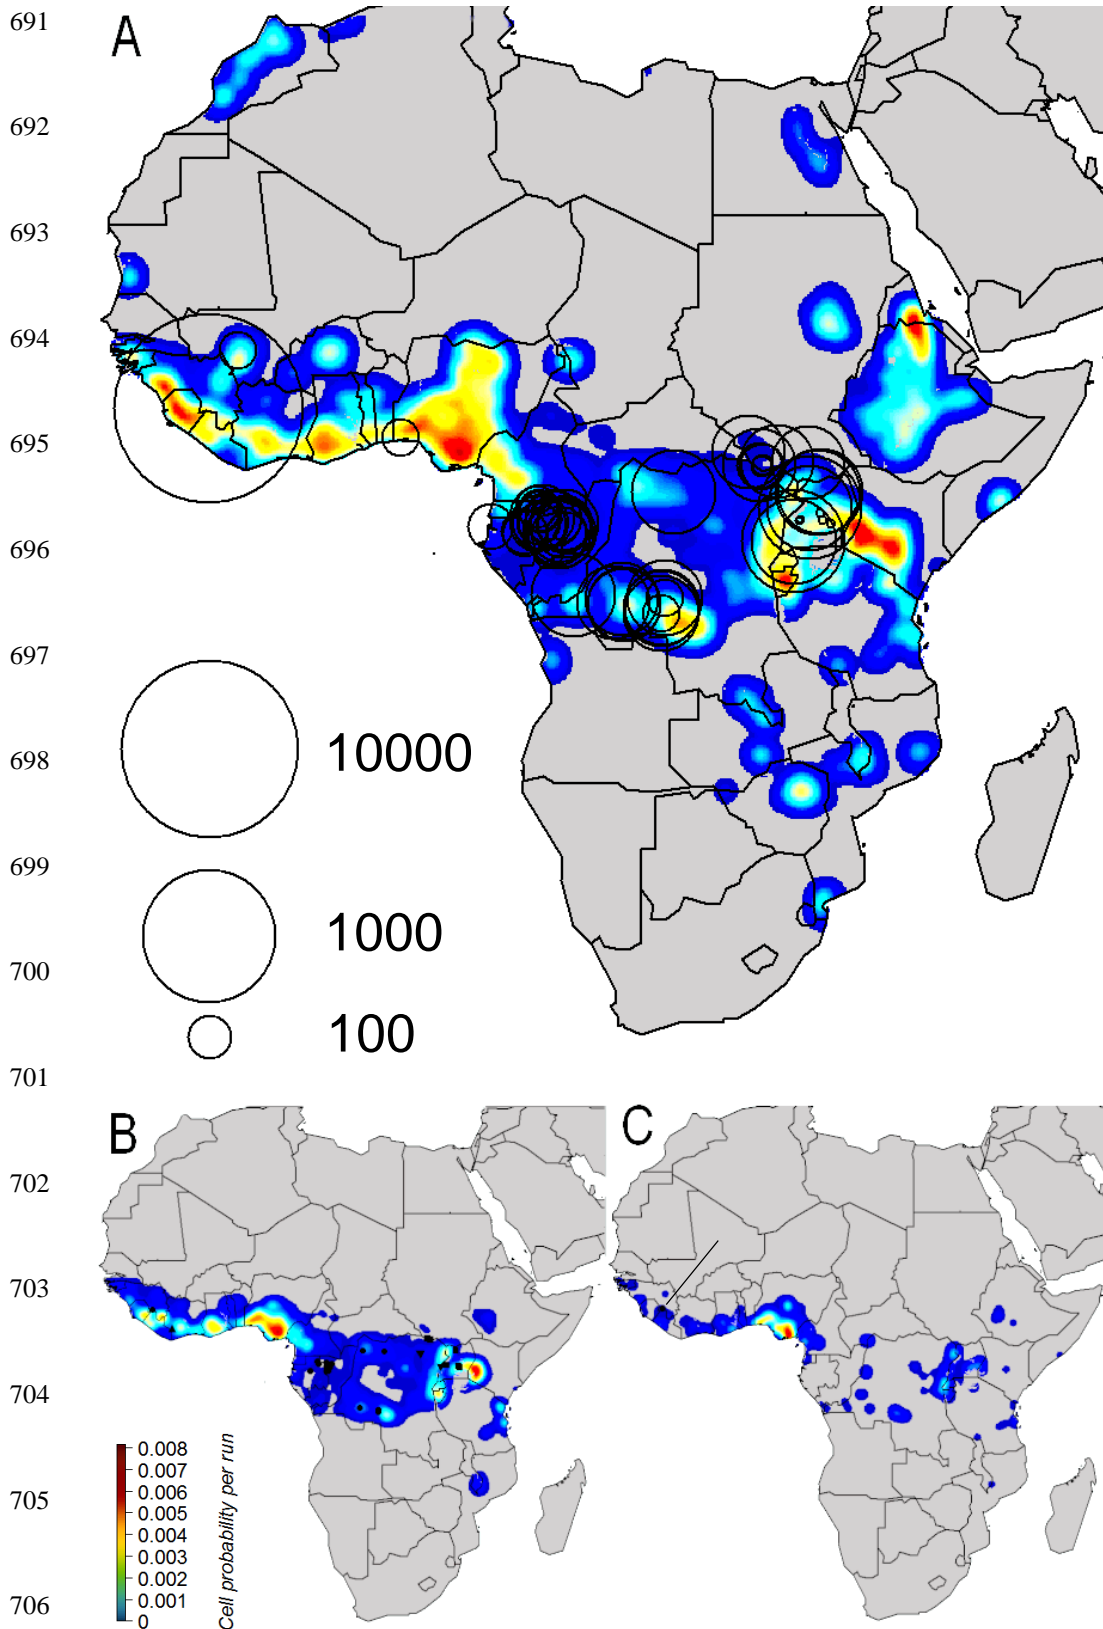

707 **Fig. 3. Present day risk for Zaire Ebola virus (EBOV) from EMM simulations.** Maps  
708 represent the proportion of times between zero (dark blue) and 0.01 (red) when a EVD-

Redding *et al.* Impact of global change on future Ebola emergence and spread.

709 EBOV case was present in a grid cell ( $0.0416^\circ$ ) across 2500, 365 day simulation runs for the  
710 present day, where **(A)** shows all cases (both index and secondary), **(B)** index cases only, and  
711 **(C)** index cases from epidemics (1500+ cases). Black open circles in **(A)** represent log  
712 outbreak size with the location of the index case at the centre of the circle. Black symbols in  
713 **(B)** represent all locations of known EVD index cases from different viral strains, where  
714 circles represent Zaire (EBOV), square Sudan (SUDV), triangles Tai Forest (TAFV), and  
715 tetrahedrons Bundibugyo (BDBV). Single black circle in **(C)** shows the only known site  
716 where an epidemic has occurred, with the black line highlighting its location.

717

718

Redding *et al.* Impact of global change on future Ebola emergence and spread.

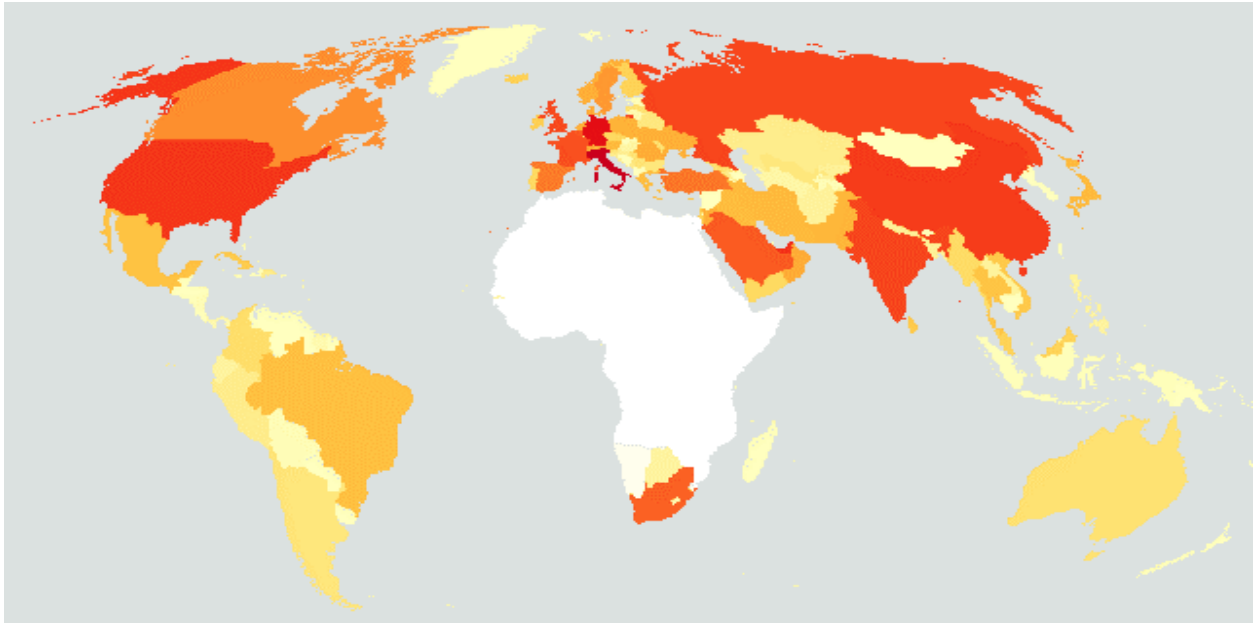

719

720

**Fig. 4. Most common country locations for importation of EBOV infected individuals.**

721

Map shows the countries that received, by airline flights, the most EBOV infected individuals

722

(Red) with paler, orange and then yellow coloured countries having proportional fewer

723

importations and white showing the EVD endemic area. Data come from 2500 simulations

724

of EVD outbreaks under present data climate, land-use, demographic and transportation

725

conditions.

726

Redding *et al.* Impact of global change on future Ebola emergence and spread.

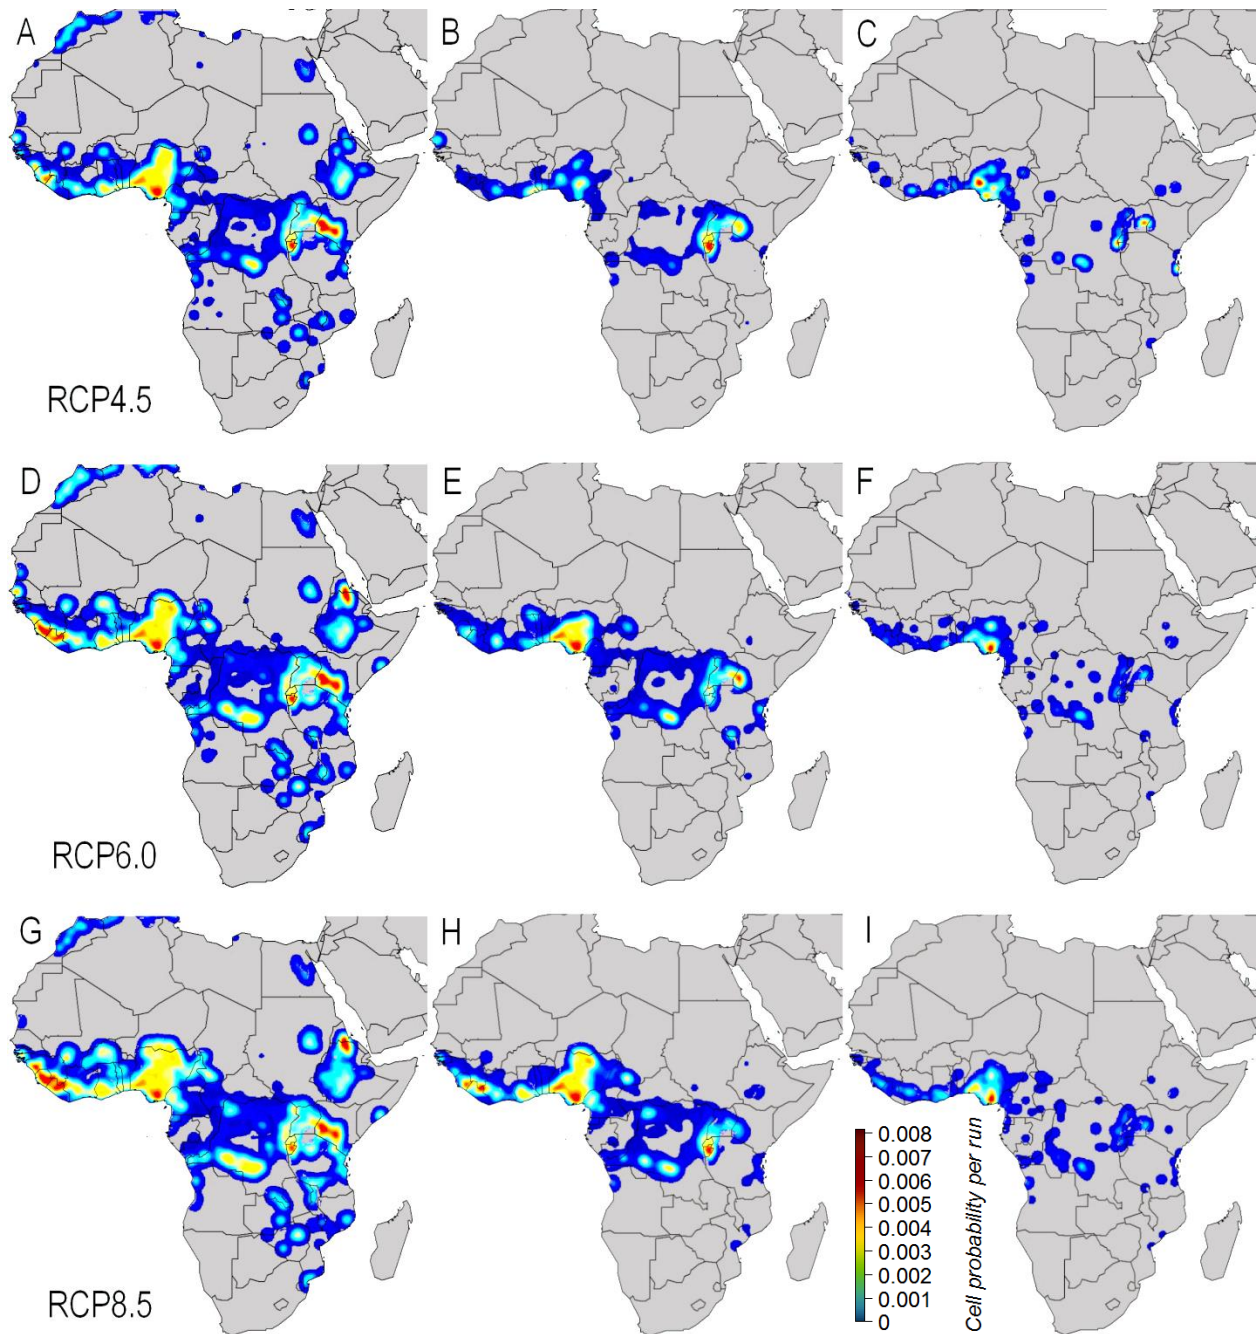

727

728 **Fig. 5. Future risk for Zaire Ebola virus (EBOV) from EMM simulations for 2070.** Maps  
729 represent the proportion of times between zero (dark blue) and 0.01 (red) when a EVD-  
730 EBOV case was present in a grid cell ( $0.0416^\circ$ ), where (A, D, G) show all cases (both index  
731 and secondary), (B, E, H) index cases only, and (C, F, I) index cases from epidemics (1500+  
732 cases), with data from EMM simulations for 2070, where rows show three different scenarios  
733 of global change (RCP4.5/SSP1, RCP6.0/SSP2, RCP8.5/SSP3).



Redding *et al.* Impact of global change on future Ebola emergence and spread.

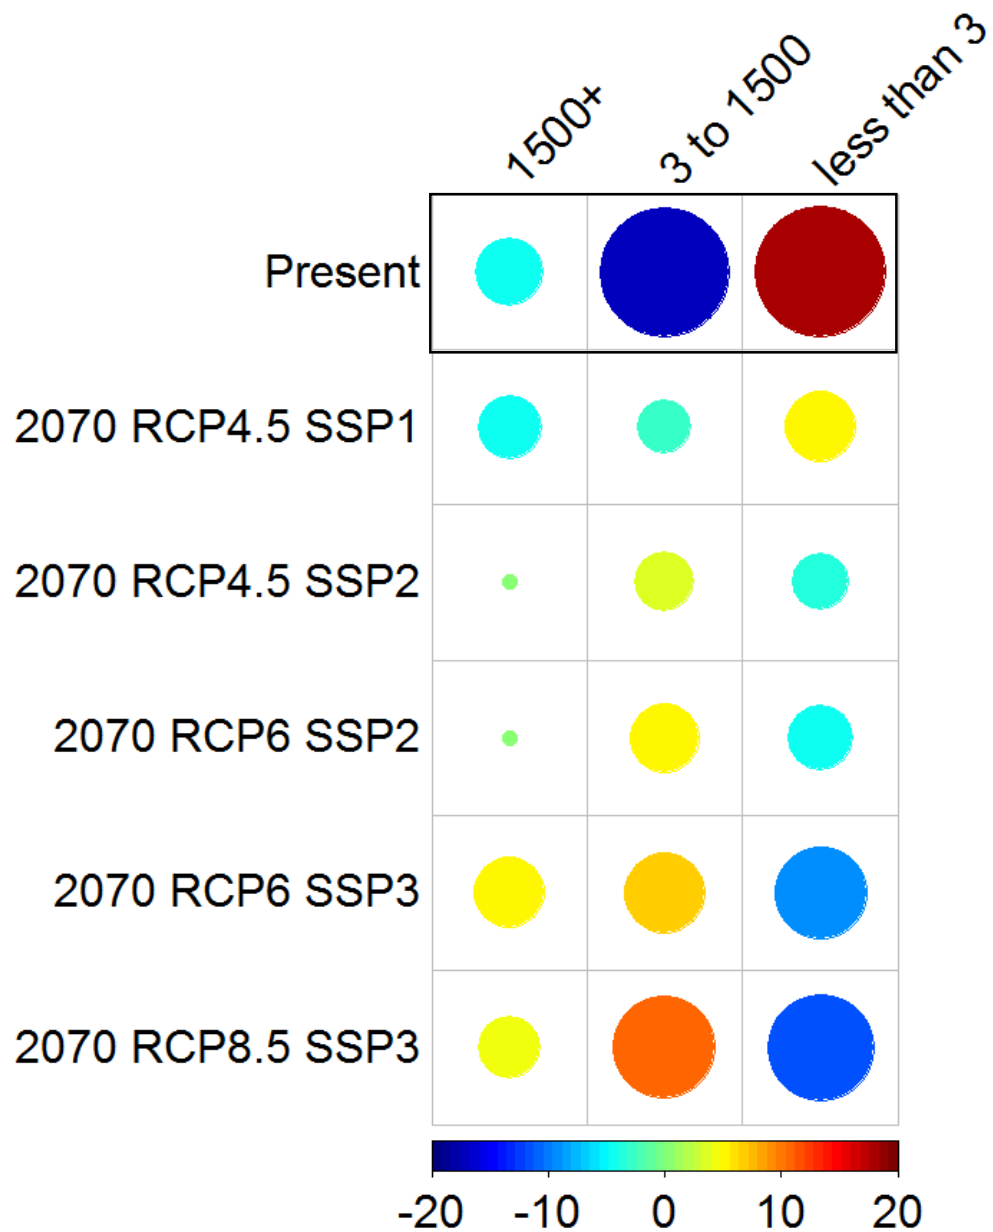

734

735 **Fig. 6. Comparison of 2070 EMM simulation scenarios by EVD-EBOV final epidemic**  
 736 **size.** Circles represents standardized residuals from a chi-squared test of association between  
 737 simulation scenario and final outbreak size category. More orange/red colours show greater  
 738 than expected number of outbreaks in a cell (for any given scenario and final outbreak size),  
 739 with more blue colours representing fewer than expected outbreaks. Size of circle indicates  
 740 the quantity greater or less than expected, with large circle more different than expected from

Redding *et al.* Impact of global change on future Ebola emergence and spread.

741 random allocation of simulation runs among grid cells and small circles close to the expected  
742 number.



Redding *et al.* Impact of global change on future Ebola emergence and spread.

743 **Supplementary Information:**

744 **Section S1**

745 EMM compartmental transition algorithm.

746 For each time step  $t$ , the number of individuals moving through disease compartments  
747 both within and between grid cells (see Fig. 2) was estimated using disease transmission  
748 parameters. We predicted the likely movement between disease compartments per time step,  
749 by drawing randomly from a binomial distribution. We describe this process below, using as  
750 an example the movement of individuals moving from Exposed to Infectious compartments  
751 within grid cells.

752

753 1. We determined the probability that a number of individuals were likely to move from the  
754 Exposed to Infectious compartments as:

755

756 
$$p(k_i \text{ infections within } E_t) = \binom{E_t}{k_i} \alpha_t^{k_i} (1 - \alpha_t)^{E_t - k_i} \quad (\text{Equation 1})$$

757

758 where  $k_i$  represents the number of individuals that enter the Infectious compartment,  $E_t$   
759 the number of Exposed individuals at time  $t$ , and  $\alpha_t$  the transition probability at time  $t$ .

760 2. Using Equation 1, we determined for any value of  $k_i$  the probability of  $k_i$  individuals that  
761 move into the Infectious compartment, i.e., we computed the probability of the number of  
762 people, between 0 and the total number of individuals in the Exposed compartment,  
763 entering the Infectious compartment at time step  $t$ . We then drew randomly from this  
764 probability distribution to choose  $k_i$  individuals that moved into the Infectious  
765 compartment, thereby weighting the choice towards the more likely outcomes given  $\alpha$ .

766 3. Once the number of people that will be infected in the next time step  $k_i$  was determined,  
767 then  $k_i$  individuals were removed from the Exposed compartment and added to the  
768 Infectious compartment.

769 4. This process continued (per time step) until the number of individuals in the Exposed  
770 compartment equaled zero.

771

772 The same process was applied to every compartment change using the respective  
773 transition probabilities (i.e., substituting  $\alpha$  in the above example). Movement of individuals  
774 between respective Exposed and Infectious compartments between grid cells was also

Redding *et al.* Impact of global change on future Ebola emergence and spread.

775 modelled similarly, but stopping movements if the exposed or infectious number dropped to  
776 zero but with no change to susceptible numbers. Due to the high morbidity from this disease,  
777 individuals in the Infectious compartment were deemed less likely to travel and were  
778 awarded a travel probability that was half of the expected rate for non-symptomatic  
779 individuals.

780  
781 Force of zoonotic infection,  $\lambda_z$  algorithms.

782 The force of infection for zoonotic host to human transmission,  $\lambda_z$  was estimated per grid  
783 cell, per time step  $t$ , as follows:

$$784 \lambda_{z_t} = \kappa H \quad (\text{Equation 2})$$

785  
786 where  $\kappa$  = spill-over risk, and  $H$  = probability of zoonotic host presence per grid cell. Spill-  
787 over event probability,  $\kappa$  per person, per time step is given by:

$$788 \kappa = \left( \frac{O}{S_h T} \right) \quad (\text{Equation 3})$$

790  
791 where  $O$  = number of historic outbreaks,  $S_h$  = number of historically susceptible individuals,  
792 and  $T$  = total time when infections could have occurred. Note: Above we are estimating the  
793 probability of an individual being involved in a spill-over event directly from an animal host,  
794 which is distinct from the overall risk of contracting the disease.

795  
796 Force of infection,  $\lambda$  algorithms.

797 The force of infection for human-to-human transmission, per grid cell and per time step  
798  $t$ , was estimated as:

$$799 \lambda_t = \beta I_t + \beta F_t \quad (\text{Equation 4})$$

800  
801 where  $\beta$  = effective contact rate,  $I_t$  = number of individuals in Infectious compartment at time  
802 step  $t$ , and  $F_t$  = number of individuals in Funeral compartment at time step  $t$ . For simplicity  
803 we assumed that  $\beta I$  and  $\beta F$  were the same (hereafter referred to as  $\beta$ ). When  $t = 0$ ,  $\beta$  is given  
804 by:

$$805 \beta = m * \left( \frac{R_0}{ND} \right) \quad (\text{Equation 5})$$

807

Redding *et al.* Impact of global change on future Ebola emergence and spread.

808 where  $R_0$  = basic reproduction number,  $m$  = mobility,  $N$  = population size per time step, and  
809  $D$  = duration in days that an individual is infectious. In this context,  $m$  was used to modify the  
810 ideal free gas model of human movement with distances travelled which are spatially variable  
811 across the landscape. We calculated a two-dimensional collision frequency  $c$ , per person per  
812 grid cell(65) as follows:

813  
814 
$$c = nv\Delta tq^2$$
 (Equation 6)

815  
816 where  $n$  = number of individuals,  $v$  = walking velocity,  $\Delta t$  = time period and  $q$  = interaction  
817 sphere radius. In the context of our simulation,  $v\Delta t$  represents daily walking distance. Then  
818 we defined  $m$  as the inverse deviation from a mean of  $c$  such that areas with more movement  
819 have a higher effective contact rate. However, when  $t > 0$  we redefined  $\beta$  as follows:

820  
821 
$$\beta = m * \left(\frac{R_e}{ND}\right)$$
 (Equation 7)

822  
823 where  $R_e$  = effective reproduction number,  $m$  = mobility,  $N$  = population size per time step,  
824 and  $D$  = duration in days that an individual is infectious.  $R_e$  is related to  $R_0$  but due to changes  
825 in human behaviour and health care responses,  $R_e$  may be lower and decline over time, in  
826 addition to the implicit reduction in  $R$  as the pool of susceptibles decreases during an  
827 outbreak. We make the assumption that the effective reproduction number reduces on a daily  
828 basis due to increasingly strong health care responses over time.

829 So initially, when  $t = 1$ :

830 
$$R_e = aR_0$$
 (Equation 8)

831  
832 where  $R_e$  = effective reproduction number at  $t = 1$ ,  $a$  = decay rate, and  $R_0$  = basic  
833 reproduction number. However, when  $t > 1$ :

834  
835 
$$R_e^{t+1} = aR_e^t$$
 (Equation 9)

836  
837 where  $R_e^t$  = effective reproduction number at time  $t$ , and  $a$  = decay rate. We define decay rate  
838  $a$  per grid cell, from the empirical relationship between wealth and health outcomes. Using  
839 either direct or derived empirical estimates of the gradient of the change in  $R_e$  over time from  
840 (13, 19, 21, 22), we fitted an exponential decay curve between estimates of per capita Gross

Redding *et al.* Impact of global change on future Ebola emergence and spread.

841 Domestic Product measured as Purchasing Power Parity (from 37) and the gradient of  $R_e$   
842 change per day. The starting  $R_e$  decay value  $a$  per grid cell, was given by:

843  
844 
$$a = 1.024 \times GDP^{-w_2} \quad (\text{Equation 10})$$

845  
846 where the best estimate for exponent  $w_2$  was -0.848,  $GDP$  = Gross Domestic Product from  
847 (63), pseudo  $r^2 = 0.76$ , and  $n = 8$ .

848  
849 The poverty-weighted Case Fatality Rate ( $wCFR$ ) per grid cell, was given by:

850  
851 
$$wCFR = 0.21 \ln\left(\frac{1}{GDP}\right)^{-w_1} \quad (\text{Equation 11})$$

852 where the best estimate for exponent  $w_1$  was -0.0239,  $GDP$  = Gross Domestic Product from  
853 (63), pseudo  $r^2 = 0.9081$ , and  $n = 20$ .

854

Redding *et al.* Impact of global change on future Ebola emergence and spread.

855

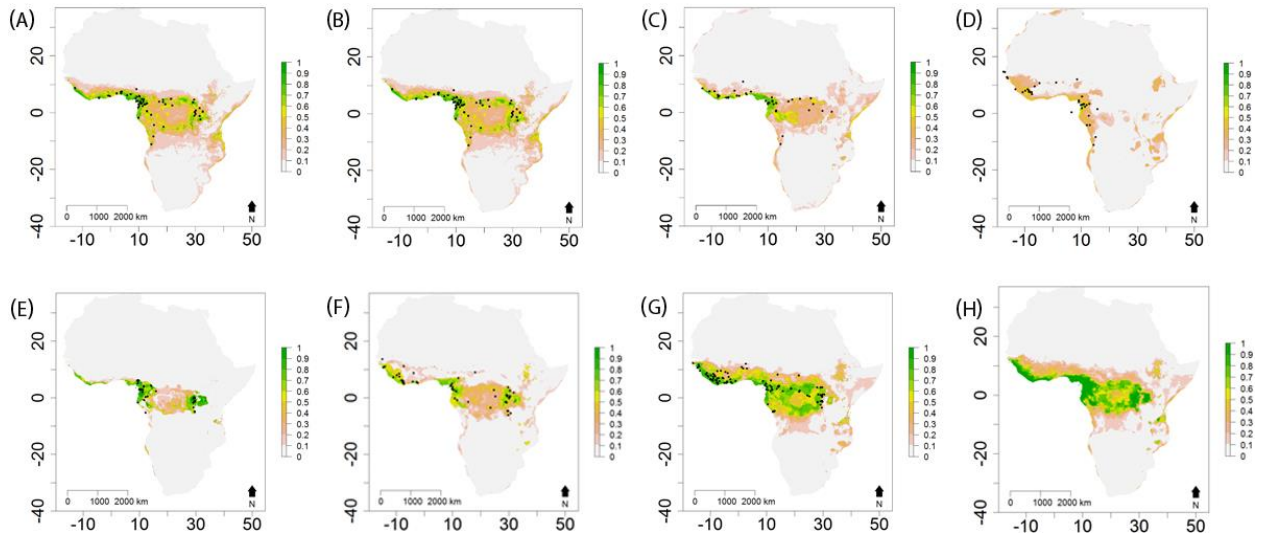

856

857

858 **Fig. S1| Maps of present day occurrence probability,  $H$  of EBOV host and other**  
859 **infection source species estimated from boosted-regression trees (BRT) models.**

860 Probability of species occurrence per grid cell ( $0.0416^\circ$ ) is represented on a linear color scale  
861 where green is most suitable ( $p(H) = 1$ ) and white unsuitable ( $p(H) = 0$ ) where (A)

862 *Epomophorus gambianus gambianus*; (B) *Epomops franqueti*; (C) *Hypsignathus monstrosus*;

863 (D) *Rousettus aegyptiacus*; (E) *Gorilla spp.*; (F) *Pan spp.*; (G) *Cephalophus spp.*; and (H) all

864 species combined. Axis labels indicate degrees in a World Geodetic System 84 projection.

865 Filled black circles represent GBIF (52) occurrence records.

Redding *et al.* Impact of global change on future Ebola emergence and spread.

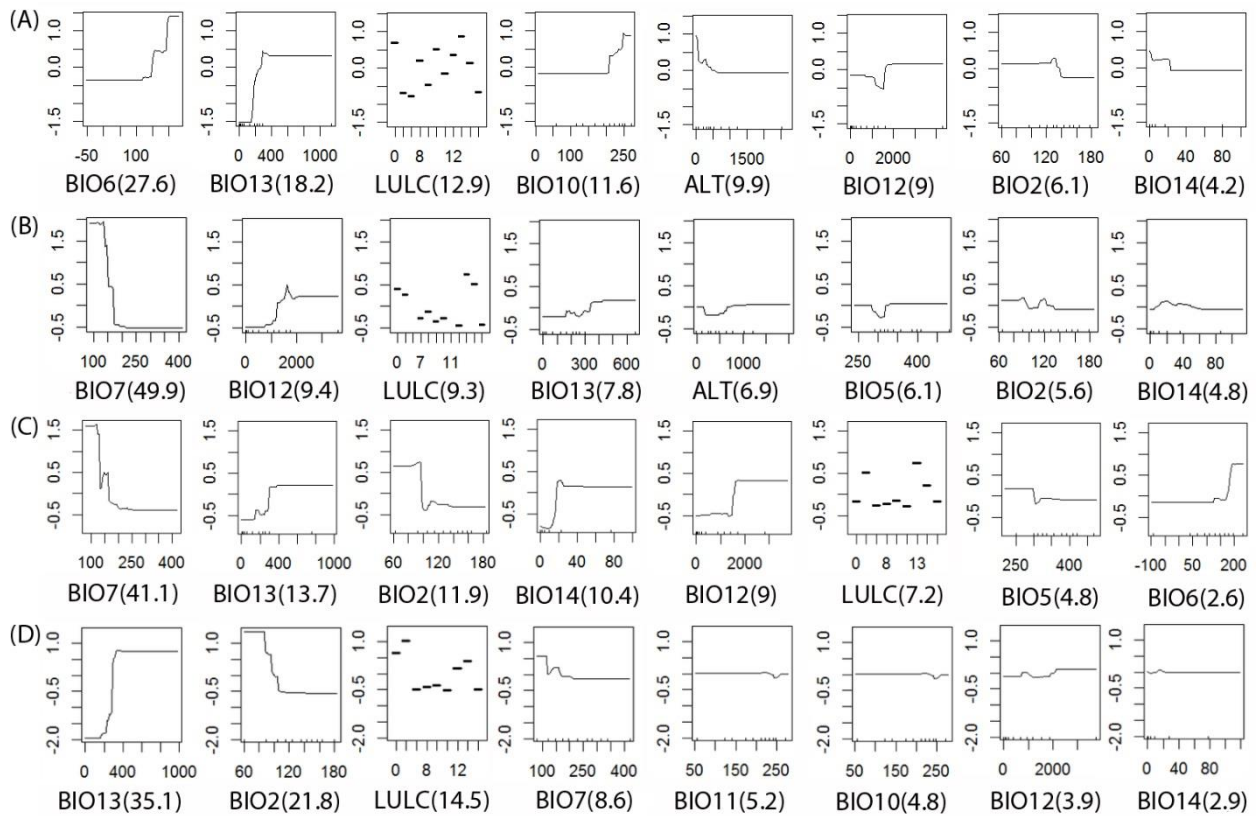

866  
867

868 **Fig. S2| Response curves from boosted-regression trees (BRT) models of EBOV host**  
 869 **species occurrences.** Each plot represents the shape of the normalized fitted functions for  
 870 each variable where (A) *Epomophorus gambianus gambianus*; (B) *Epomops franqueti*; (C)  
 871 *Hypsignathus monstrosus*; and (D) *Rousettus aegyptiacus*. The relative percentage  
 872 contribution of each variable to the model in terms of variance explained is given in  
 873 parenthesis, where only the top eight variables of the model are included for each species.  
 874 Variable abbreviations are defined in table S2.

Redding *et al.* Impact of global change on future Ebola emergence and spread.

875

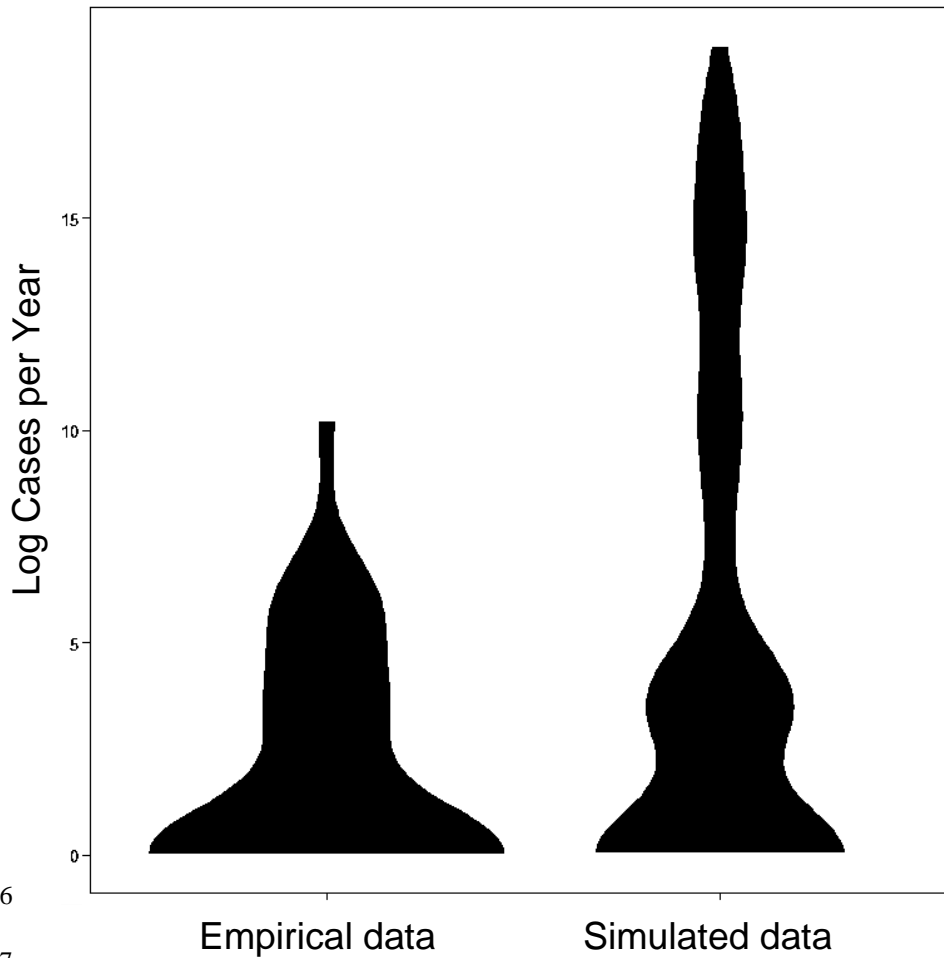

876

877

878 **Fig. S3| Distributions of relative frequency of EBOV cases per year.** Violin plots  
879 represent the empirical observed (n=23 outbreaks) data of log total number of cases per year  
880 from 1967-2016 (66), and log total number of cases per year (n=2500 runs) from EMM  
881 simulations for present day environmental and demographic conditions.

882

Redding *et al.* Impact of global change on future Ebola emergence and spread.

883

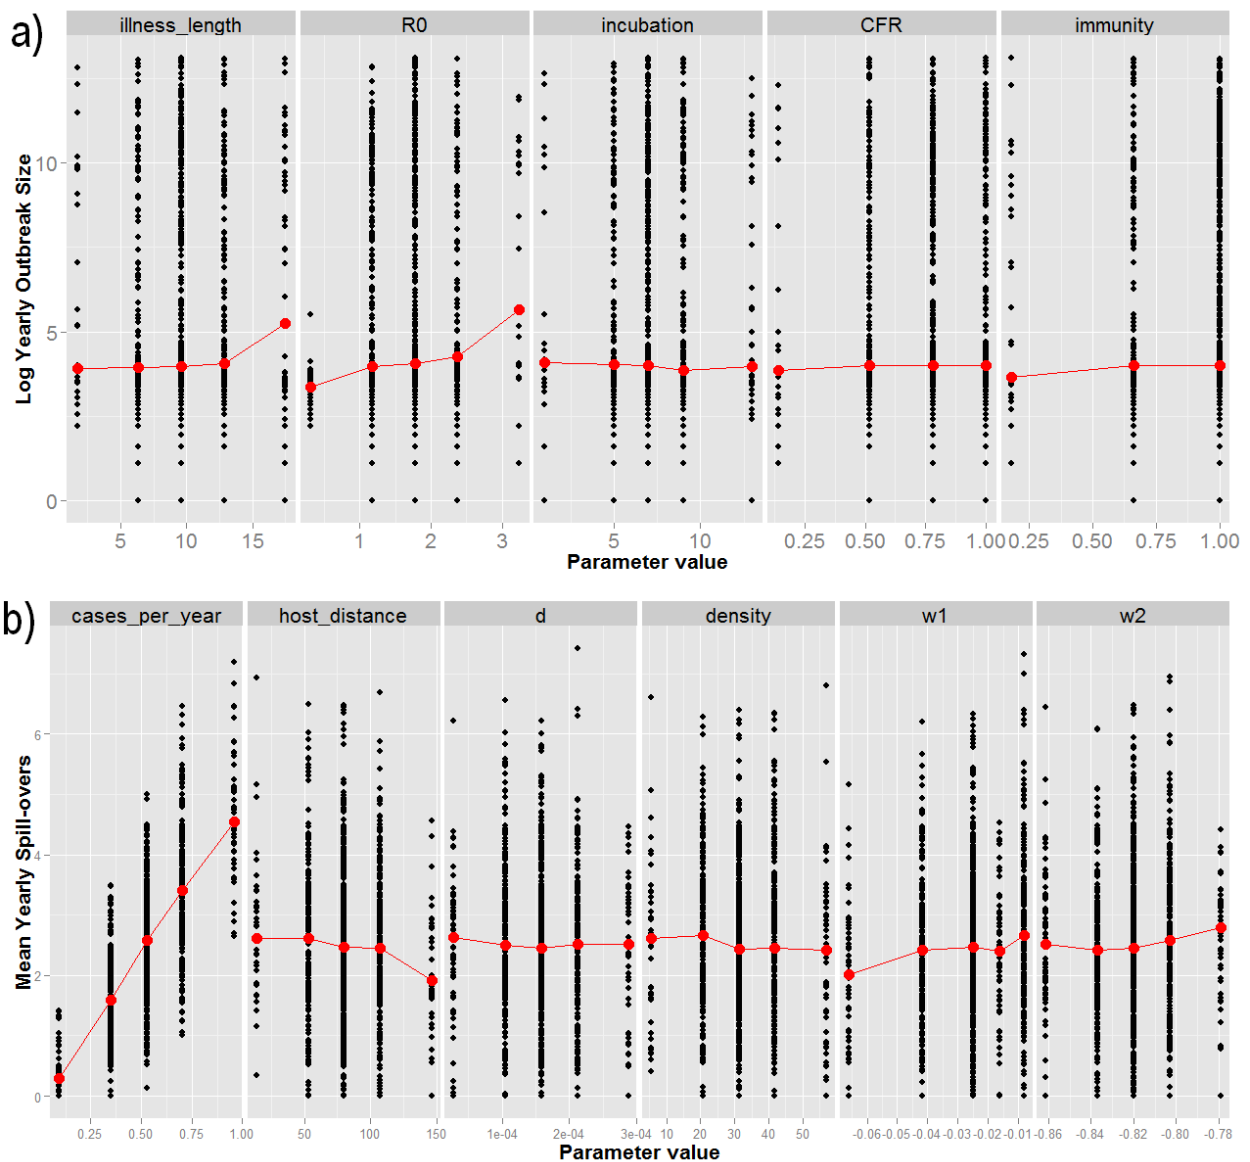

884

885

886

887

888

889

890

891

892

893

894

895

896

897

898

898

**Fig. S4| Sensitivity plots of input parameters for (a) total number of annual log EVD cases, and (b) mean annual spill-overs.** Black dots show the response values per simulation and are jittered for greater clarity. Red dots represent the median values for each parameter value, and red lines join the medians to aid interpretation of any trend. Parameters are as follows: illness length - mean number of days in the infectious compartment;  $R_0$  – basic reproductive number; incubation - mean number of days in the exposed compartment; CFR - mean case fatality rate per illness; immunity - mean immunity to re-infection where 1 is totally immune; cases per year - mean spill-over rate constant; host distance - mean daily distance (m) travelled by host reservoir species; density - mean number of reservoir host individuals per grid cell; w2 - shape of the effective reproductive number ( $R_e$ ) decay curve, where low values represent a less curved, more linear negative relationship; and w1 - shape of the CFR~poverty curve, where lower values represent a less curved, more linear negative relationship.



Redding *et al.* Impact of global change on future Ebola emergence and spread.

899

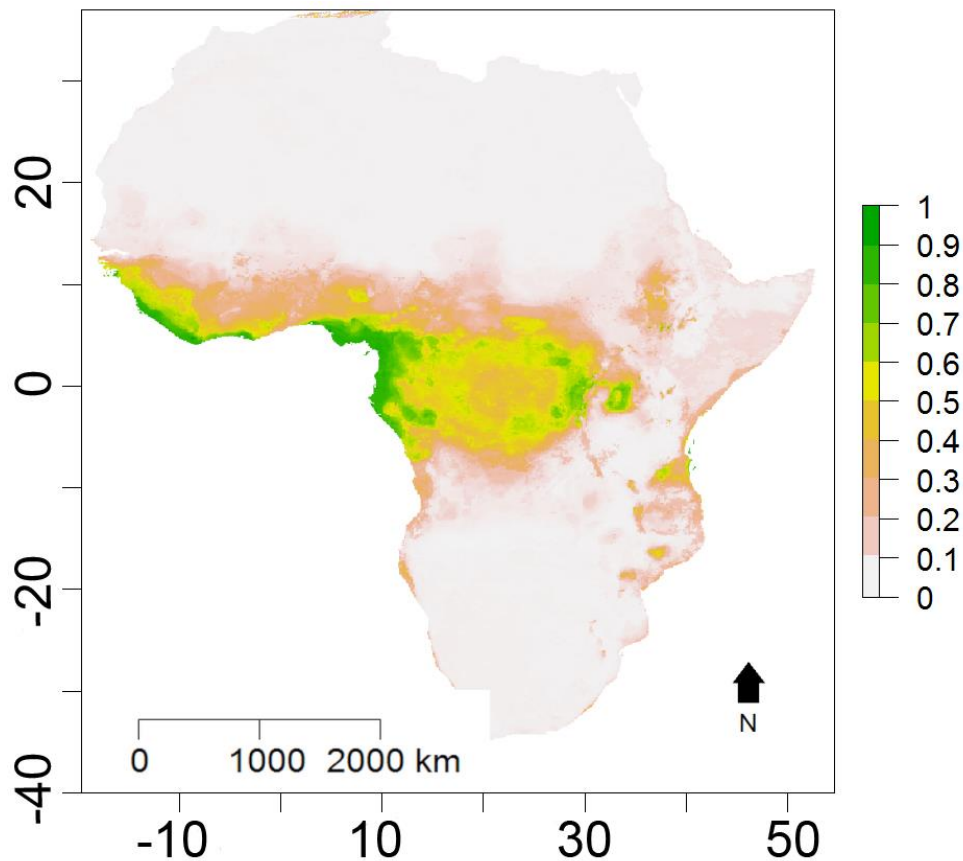

900

901 **Fig. S5| Map of future occurrence probability,  $H_{2070}$  of EBOV host and other infection**  
902 **source species estimated from boosted-regression trees (BRT) models under the medium**  
903 **outlook RCP6 scenario.** Probability of species occurrence per grid cell ( $0.0416^\circ$ ) is  
904 represented on a linear color scale where green is most suitable ( $p(H) = 1$ ) and white  
905 unsuitable ( $p(H) = 0$ ) for all species combined. Axis labels indicate degrees in a World  
906 Geodetic System 84 projection.

907

908

Redding *et al.* Impact of global change on future Ebola emergence and spread.

909 **Table S1| Seroprevalance of EBOV in reservoir host species.** Species assignments  
 910 followed the taxonomy in (67). Prevalence was measured as the proportion of positive results  
 911 per sample and raw prevalence data was transformed to a rank within each study. Direct  
 912 prevalence comparisons were not possible due to methodological differences. We estimated  
 913 the most important EBOV host species as those that appear as the top two ranks in all  
 914 sources. We identified four candidate bat species hosts: *Epomops franqueti*, *Epomophorus*  
 915 *gambianus gambianus*, *Hypsignathus monstrosus*, and *Rousettus aegyptiacus*. N represents  
 916 sample size; Hipp Hipposideridae; Molo Molossidae; Ptero Pteropodidae; CI Côte d'Ivoire;  
 917 SL Sierra Leone; LR Liberia; GH Ghana; CG Congo; and GA Gabon.

918

| Family | Species                        | Country        | N   | Prevalence | Rank | Source |
|--------|--------------------------------|----------------|-----|------------|------|--------|
| Hipp   | <i>Hipposideros sp.</i>        | CG, SL, LR     | 98  | 0.04       | 4    | (68)   |
| Molo   | <i>Mops condylurus</i>         | CI, SL, LR, CG | 37  | 0.05       | 4    | (68)   |
| Ptero  | <i>Eidolon helvum</i>          | GH             | 252 | 0.004      | -    | (69)   |
| Ptero  | <i>Epomophorus gambianus</i>   | GH             | 37  | 0.38       | 2    | (70)   |
|        | <i>gambianus</i>               |                |     |            |      |        |
| Ptero  | <i>Epomops franqueti</i>       | GH             | 27  | 0.37       | 2    | (70)   |
| Ptero  | <i>Epomops franqueti</i>       | GA, CG         | 11  | 0.07       | 2    | (14)   |
| Ptero  | <i>Epomops franqueti</i>       | GA, CG         | 805 | 0.04       | 2    | (27)   |
| Ptero  | <i>Epomops franqueti</i>       | CI, SL, LR, CG | 62  | 0.08       | 3    | (68)   |
| Ptero  | <i>Hypsignathus monstrosus</i> | GH             | 16  | 0.44       | 1    | (70)   |
| Ptero  | <i>Hypsignathus monstrosus</i> | GA, CG         | 17  | 0.24       | 1    | (14)   |
| Ptero  | <i>Hypsignathus monstrosus</i> | GA, CG         | 125 | 0.07       | 1    | (27)   |
| Ptero  | <i>Hypsignathus monstrosus</i> | CI, SL, LR, CG | 70  | 0.16       | 2    | (68)   |
| Ptero  | <i>Micropteropus pusillus</i>  | GA, CG         | 197 | 0.02       | 4    | (27)   |
| Ptero  | <i>Micropteropus sp.</i>       | CG             | 40  | 0.03       | 4    | (68)   |
| Ptero  | <i>Myonycteris torquata</i>    | GA, CG         | 58  | 0.07       | 3    | (14)   |
| Ptero  | <i>Myonycteris torquata</i>    | GA, CG         | 573 | 0.03       | 3    | (27)   |
| Ptero  | <i>Myonycteris torquata</i>    | CI, SL, LR, CG | 307 | 0.01       | 5    | (68)   |
| Ptero  | <i>Nanonycteris veldkampii</i> | GH             | 4   | 0.25       | 3    | (70)   |
| Ptero  | <i>Rousettus aegyptiacus</i>   | GA, CG         | 307 | 0.08       | 1    | (27)   |
| Ptero  | <i>Rousettus aegyptiacus</i>   | CG             | 2   | 1.00       | 1    | (68)   |

919

Redding *et al.* Impact of global change on future Ebola emergence and spread.

920 **Table S2| Details of bioclimatic and land use variables used to estimate probability of**  
 921 **EBOV host presence, *H.*** Nine most orthogonal (<75% correlation) bioclimatic variables  
 922 were chosen from (71). For analysis, all variables were reduced in latitudinal extent to 85° N,  
 923 58° S and resampled to a 0.0416° grid cell size using a World Geodetic System 84 projection.  
 924 LULC is a categorical dataset where the most predominant land use-land cover type in each  
 925 grid cell is given within the following categories: Evergreen needle leaf forest; Evergreen  
 926 broadleaf forest; Deciduous needle leaf forest; Deciduous broadleaf forest; Mixed forest;  
 927 Closed shrublands; Open shrublands; Woody savannah; Grassland; Permanent wetlands;  
 928 Cropland; Urban and built-up; Cropland/natural vegetation mosaic; Snow and ice; Barren or  
 929 sparsely vegetated; and Water bodies.

930

| No. | Variable Description                      | Original Spatial Extent | Original Spatial Resolution (cell size at equator) | Temporal Resolution | Source |
|-----|-------------------------------------------|-------------------------|----------------------------------------------------|---------------------|--------|
| 1   | BIO2 Mean Diurnal Temperature Range       | Global                  | 1km                                                | 2012                | (71)   |
| 2   | BIO5 Maximum Temperature of Warmest Month | Global                  | 1km                                                | 2012                | (71)   |
| 3   | BIO6 Minimum Temperature of Coldest Month | Global                  | 1km                                                | 2012                | (71)   |
| 4   | BIO7 Temperature Annual Range             | Global                  | 1km                                                | 2012                | (71)   |
| 5   | BIO10 Mean Temperature of Warmest Quarter | Global                  | 1km                                                | 2012                | (71)   |
| 6   | BIO11 Mean Temperature of Coldest Quarter | Global                  | 1km                                                | 2012                | (71)   |
| 7   | BIO12 Annual Precipitation                | Global                  | 1km                                                | 2012                | (71)   |
| 8   | BIO13 Precipitation of Wettest Month      | Global                  | 1km                                                | 2012                | (71)   |
| 9   | BIO14 Precipitation of Driest Month       | Global                  | 1km                                                | 2012                | (71)   |
| 10  | ALT Digital Elevation Model               | Global                  | 1km                                                | 2008                | (72)   |
| 11  | LULC Land Use-Land Cover                  | Global                  | 500m                                               | 2001-2012           | (36)   |

931

Redding *et al.* Impact of global change on future Ebola emergence and spread.

932 **Table S3| Estimates of global daily walking distances,  $v\Delta t$ .** Estimates of daily walking  
 933 distances were collected from the literature per country. Daily step numbers were converted  
 934 to distance (km) using an average step length of 1.41m (73). As studies have suggested that  
 935 daily walking distance is stratified among income categories (74), countries were assigned to  
 936 income bands based on per capita Gross Domestic Product (GDP) (measured as Purchasing  
 937 Power Parity from 37) such that the poorest countries were given a value of 1 and the richest  
 938 4. A mean estimate of walking distance was calculated for each band. Countries were then  
 939 assigned a walking distance corresponding to their GDP band. No estimates were found for  
 940 band 3 (\$1600 - \$35000), so countries in this band were given daily walking distances  
 941 halfway between bands 2 and 4.

942

| Country                  | Steps | Distance (km) | GDP band | GDP PPP Per capita (lower bound) \$ | GDP PPP Per capita (upper bound) \$ | Mean km Per GDP Band | Source |
|--------------------------|-------|---------------|----------|-------------------------------------|-------------------------------------|----------------------|--------|
| Niger                    | -     | 7             | 1        | 0                                   | 1600                                | 9.6                  | (75)   |
| Central African Republic | -     | 8             | 1        | 0                                   | 1600                                | 9.6                  | (75)   |
| Chad                     | -     | 15            | 1        | 0                                   | 1600                                | 9.6                  | (75)   |
| Mali                     | -     | 13.2          | 1        | 0                                   | 1600                                | 9.6                  | (75)   |
| Niger                    | -     | 4.8           | 1        | 0                                   | 1600                                | 9.6                  | (75)   |
| South Africa             | 12471 | 8.85          | 2        | 1600                                | 13000                               | 8.5                  | (76)   |
| Tanzania                 | -     | 8.3           | 2        | 1600                                | 13000                               | 8.5                  | (77)   |
| Australia                | 9695  | 6.88          | 4        | 35000                               | 128530                              | 5.6                  | (78)   |
| Japan                    | 7168  | 5.08          | 4        | 35000                               | 128530                              | 5.6                  | (78)   |
| Switzerland              | 9650  | 6.85          | 4        | 35000                               | 128530                              | 5.6                  | (78)   |
| United States            | 5117  | 3.63          | 4        | 35000                               | 128530                              | 5.6                  | (78)   |

943

944

Redding *et al.* Impact of global change on future Ebola emergence and spread.

945 **Table S4| Collated epidemiological data on EBOV outbreaks.** Data on 19 locations that  
 946 have experienced EBOV outbreaks or importations and have data on either Case Fatality Rate  
 947 (CFR) (13, 18, 54, 79-83) or on Effective Reproductive Number change (21, 54, 79, 84-86)  
 948 ( $R_e$  gradient per week). The latter data was either taken directly from tables or text from  
 949 within literature sources or estimated (Spain, United Kingdom, Nigeria, United States) from  
 950 descriptions of outbreak events detailed in the sources. Child mortality data for the year of  
 951 outbreak is taken from World Bank Development Indicators (37)

952

| Location         | County | Year       | ln GDP per capita<br>for year | CFR      | $R_e$ gradient per week |
|------------------|--------|------------|-------------------------------|----------|-------------------------|
| United States    | Texas  | 2014       | 4.74                          | 0.3      | 0.5                     |
| Guinea           |        | 2014       | 3.09                          | 0.707    | 0.113636                |
| Sierra Leone     |        | 2014       | 3.31                          | 0.69     | 0.076923                |
| Liberia          |        | 2014       | 2.99                          | 0.723    | 0.04                    |
| Germany          |        | 2014       | 4.66                          | 0        |                         |
| Spain            | Madrid | 2014       | 4.53                          | 0        | 0.5                     |
| United Kingdom   | London | 2014       | 4.59                          | 0        | 3                       |
| Nigeria          |        | 2014       | 3.77                          | 0.666667 | 0.533333                |
| Mali             |        | 2014       | 3.24                          | 0.75     |                         |
| Congo, Dem. Rep. |        | 1976       | 2.72                          | 0.88     | 0.105                   |
| Gabon            |        | 1994       | 4.14                          | 0.61     |                         |
| Congo, Dem. Rep. |        | 1995       | 2.72                          | 0.81     |                         |
| Gabon            |        | Early-1996 | 4.17                          | 0.68     |                         |
| Gabon            |        | Late-1996  | 4.17                          | 0.75     |                         |
| Gabon            |        | 2001–2002  | 4.15                          | 0.82     |                         |
| Congo, Rep.      |        | 2001–2002  | 3.58                          | 0.76     |                         |
| Congo, Rep.      |        | Early-2003 | 3.6                           | 0.89     |                         |
| Congo, Rep.      |        | Late-2003  | 3.6                           | 0.83     |                         |
| Congo, Rep.      |        | 2005       | 3.65                          | 0.75     |                         |

953

954

955

956
